# Supplementary material for: Age-specific associations between underlying health conditions and hospitalisation, death and in-hospital death among confirmed COVID-19 cases: a multi-country study based on surveillance data, June to December 2020
Source: PubMed Central journal article supplement (PMC9438397; doi:10.2807/1560-7917.es.2022.27.35.2100883), 2022-09-01
Supplement: 21-00883_BUNDLE_Supplement.pdf [file 21-00883_BUNDLE_Supplement.pdf]

## Supplementary material

*This supplementary material is hosted by Eurosurveillance as supporting information alongside the article “Age specific associations between underlying health conditions and hospitalisation, death and in-hospital death among confirmed COVID-19 cases: a multi-country study”, on behalf of the authors, who remain responsible for the accuracy and appropriateness of the content. The same standards for ethics, copyright, attributions and permissions as for the article apply. Supplements are not edited by Eurosurveillance and the journal is not responsible for the maintenance of any links or email addresses provided therein.*

### Supplementary files:

|                                                                                                                                                                                                                                |    |
|--------------------------------------------------------------------------------------------------------------------------------------------------------------------------------------------------------------------------------|----|
| Table S1 Characteristics of COVID-19 cases included in the primary analysis .....                                                                                                                                              | 3  |
| Table S2 Distribution of outcome and exposure variables across all cases, cases dropped from the analysis due to missing information and those included in the analysis .....                                                  | 4  |
| Table S3 Number of cases, total and with outcome, by age group included in the age-interaction models for hospitalisation.....                                                                                                 | 5  |
| Table S4 Number of cases, total and with outcome, by age group included in the age-interaction models for death                                                                                                                | 6  |
| Table S5 Number of cases, total and with outcome, by age group included in the age-interaction models for in-hospital deaths .....                                                                                             | 7  |
| Table S6 Predicted probabilities of hospitalisation for each underlying conditions and exposure compared to COVID-19 cases without an underlying condition, 2 June – 13 December 2020 .....                                    | 8  |
| Table S7 Predicted probabilities of death for each underlying conditions and exposure compared to COVID-19 cases without an underlying condition, 2 June – 13 December 2020 .....                                              | 10 |
| Table S8 Predicted probabilities of in-hospital death for each underlying conditions and exposure compared to COVID-19 cases without an underlying condition, 2 June – 13 December 2020 .....                                  | 12 |
| Table S9 Distribution of study population by age and sex with crude attack rates (AR) for each underlying condition and outcome for the sensitivity analysis, 6 February – 13 December, 2020 .....                             | 14 |
| Table S10 Age-adjusted and age-stratum specific associations between underlying condition and hospitalisation for the sensitivity analysis, 6 February – 13 December 2020.....                                                 | 15 |
| Table S11 Age-adjusted and age-stratum specific associations between underlying condition and death for the sensitivity analysis, 6 February – 13 December 2020 .....                                                          | 16 |
| Table S12 Age-adjusted and age-stratum specific associations between underlying condition and in-hospital death for the sensitivity analysis, 6 February – 13 December 2020.....                                               | 17 |
| Table S13 Predicted probabilities of hospitalisation for each underlying conditions and exposure compared to COVID-19 cases without an underlying condition for the sensitivity analysis, 7 February – 13 December 2020.....   | 18 |
| Table S14 Predicted probabilities of death for each underlying conditions and exposure compared to COVID-19 cases without an underlying condition for the sensitivity analysis, 7 February – 13 December 2020 .....            | 20 |
| Table S15 Predicted probabilities of in-hospital death for each underlying conditions and exposure compared to COVID-19 cases without an underlying condition for the sensitivity analysis, 7 February – 13 December 2020..... | 22 |

Figure S1 Predicted probabilities of hospitalisation, death and in-hospital death for each underlying conditions compared to COVID-19 cases without an underlying condition for the sensitivity analysis, 7 February – 13 December 2020.....24

**Table S1 Characteristics of COVID-19 cases included in the primary analysis**

|                          | Cases included in analysis <sup>1</sup> | Hospitalisation, n (AR%) | Death, n (AR%) | In-hospital death, n (AR%) |
|--------------------------|-----------------------------------------|--------------------------|----------------|----------------------------|
| <b>Sex</b>               |                                         |                          |                |                            |
| Female                   | 396,750                                 | 31,797 (8.0)             | 8,623 (2.2)    | 6,166 (19.4)               |
| Male                     | 366,924                                 | 39,858 (10.9)            | 11,197 (3.1)   | 9,144 (22.9)               |
| <b>Age (years)</b>       |                                         |                          |                |                            |
| <20                      | 91,305                                  | 1,236 (1.4)              | 16 (0.0)       | 13 (1.1)                   |
| 20-29                    | 97,674                                  | 1,610 (1.6)              | 11 (0.0)       | 8 (0.5)                    |
| 30-39                    | 105,350                                 | 2,811 (2.7)              | 73 (0.1)       | 56 (2.0)                   |
| 40-49                    | 129,637                                 | 4,717 (3.6)              | 191 (0.1)      | 161 (3.4)                  |
| 50-59                    | 133,060                                 | 9,106 (6.8)              | 654 (0.5)      | 556 (6.1)                  |
| 60-69                    | 84,126                                  | 12,923 (15.4)            | 2,091 (2.5)    | 1,815 (14.0)               |
| 70-79                    | 59,063                                  | 16,910 (28.6)            | 4,744 (8.0)    | 3,948 (23.3)               |
| ≥80                      | 63,459                                  | 22,342 (35.2)            | 12,040 (19.0)  | 8,753 (39.2)               |
| <b>Reporting period</b>  |                                         |                          |                |                            |
| June - September         | 73,170                                  | 10,178 (13.9)            | 1,294 (1.8)    | 1,128 (11.1)               |
| October - December       | 690,504                                 | 61,477 (8.9)             | 18,526 (2.7)   | 14,182 (23.1)              |
| <b>Reporting country</b> |                                         |                          |                |                            |
| Czechia                  | 14,204                                  | 1,315 (9.3)              | 83 (0.6)       | 82 (6.2)                   |
| Finland                  | 4,091                                   | 584 (14.3)               | 90 (2.2)       | 79 (13.5)                  |
| Ireland                  | 37,888                                  | 1,802 (4.8)              | 334 (0.9)      | 213 (11.8)                 |
| Italy                    | 467,916                                 | 50,612 (10.8)            | 16,484 (3.5)   | 12,724 (25.1)              |
| Luxembourg               | 7,135                                   | 384 (5.4)                | 52 (0.7)       | 46 (12.0)                  |
| Malta                    | 10,659                                  | 694 (6.5)                | 202 (1.9)      | 145 (20.9)                 |
| Norway                   | 10,044                                  | 305 (3.0)                | 117 (1.2)      | 60 (19.7)                  |
| Poland                   | 97,162                                  | 10,641 (11.0)            | 1,360 (1.4)    | 1,250 (11.7)               |
| Slovakia                 | 114,575                                 | 5,318 (4.6)              | 1,098 (1.0)    | 711 (13.4)                 |

<sup>1</sup>includes cases with and without underlying conditions, AR: attack rate

**Table S2 Distribution of outcome and exposure variables across all cases, cases dropped from the analysis due to missing information and those included in the analysis**

|                                 | All cases reported to TESSy <sup>1</sup><br>(n = 2,614,881) |                            |                            | Cases dropped due missing<br>information (n = 1,851,207) |                            |                            | Cases included in<br>analysis (n =<br>763,674) |      |
|---------------------------------|-------------------------------------------------------------|----------------------------|----------------------------|----------------------------------------------------------|----------------------------|----------------------------|------------------------------------------------|------|
|                                 | n                                                           | %,<br>including<br>unknown | %,<br>excluding<br>unknown | n                                                        | %,<br>including<br>unknown | %,<br>excluding<br>unknown | n                                              | %    |
| <b>Hospitalisation</b>          |                                                             |                            |                            |                                                          |                            |                            |                                                |      |
| No                              | 2,051,771                                                   | 78.5                       | 92.2                       | 1,359,752                                                | 73.5                       | 93.1                       | 692,019                                        | 90.6 |
| Yes                             | 173,199                                                     | 6.6                        | 7.8                        | 101,544                                                  | 5.5                        | 6.9                        | 71,655                                         | 9.4  |
| Unknown                         | 389,911                                                     | 14.9                       | NA                         | 389,911                                                  | 21.1                       | NA                         | NA                                             | NA   |
| <b>Death</b>                    |                                                             |                            |                            |                                                          |                            |                            |                                                |      |
| No                              | 2,152,145                                                   | 82.3                       | 98.0                       | 1,408,291                                                | 76.1                       | 98.3                       | 743,854                                        | 97.4 |
| Yes                             | 44,161                                                      | 1.7                        | 2.0                        | 24,341                                                   | 1.3                        | 1.7                        | 19,820                                         | 2.6  |
| Unknown                         | 418,575                                                     | 16.0                       | NA                         | 418,575                                                  | 22.6                       | NA                         | NA                                             | NA   |
| <b>Underlying<br/>Condition</b> |                                                             |                            |                            |                                                          |                            |                            |                                                |      |
| No                              | 691,883                                                     | 26.5                       | 83.1                       | 53,670                                                   | 2.9                        | 78.1                       | 638,213                                        | 83.6 |
| Yes                             | 140,515                                                     | 5.4                        | 16.9                       | 15,054                                                   | 0.8                        | 21.9                       | 125,461                                        | 16.4 |
| Unknown                         | 1,782,483                                                   | 68.2                       | NA                         | 1,782,483                                                | 96.3                       | NA                         | NA                                             | NA   |
| <b>Sex</b>                      |                                                             |                            |                            |                                                          |                            |                            |                                                |      |
| Female                          | 1,346,213                                                   | 51.5                       | 51.5                       | 949,463                                                  | 51.3                       | 51.3                       | 396,750                                        | 52.0 |
| Male                            | 1,268,007                                                   | 48.5                       | 48.5                       | 901,083                                                  | 48.7                       | 48.7                       | 366,924                                        | 48.0 |
| Unknown                         | 661                                                         | 0.0                        | NA                         | 661                                                      | 0.0                        | NA                         | NA                                             | NA   |
| <b>Age (years)</b>              |                                                             |                            |                            |                                                          |                            |                            |                                                |      |
| <20                             | 346,225                                                     | 13.2                       | 13.2                       | 254,920                                                  | 13.8                       | 13.8                       | 91,305                                         | 12.0 |
| 20-29                           | 350,068                                                     | 13.4                       | 13.4                       | 252,394                                                  | 13.6                       | 13.6                       | 97,674                                         | 12.8 |
| 30-39                           | 367,769                                                     | 14.1                       | 14.1                       | 262,419                                                  | 14.2                       | 14.2                       | 105,350                                        | 13.8 |
| 40-49                           | 462,395                                                     | 17.7                       | 17.7                       | 332,758                                                  | 18.0                       | 18.0                       | 129,637                                        | 17.0 |
| 50-59                           | 453,402                                                     | 17.3                       | 17.3                       | 320,342                                                  | 17.3                       | 17.3                       | 133,060                                        | 17.4 |
| 60-69                           | 273,421                                                     | 10.5                       | 10.5                       | 189,295                                                  | 10.2                       | 10.2                       | 84,126                                         | 11.0 |
| 70-79                           | 184,000                                                     | 7.0                        | 7.0                        | 124,937                                                  | 6.7                        | 6.8                        | 59,063                                         | 7.7  |
| ≥80                             | 176,813                                                     | 6.8                        | 6.8                        | 113,354                                                  | 6.1                        | 6.1                        | 63,459                                         | 8.3  |
| Unknown                         | 788                                                         | 0.0                        | NA                         | 788                                                      | 0.0                        | NA                         | NA                                             | NA   |
| <b>Reporting period</b>         |                                                             |                            |                            |                                                          |                            |                            |                                                |      |
| June - September                | 198,798                                                     | 7.6                        | 7.6                        | 125,628                                                  | 6.8                        | 6.8                        | 73,170                                         | 9.6  |
| October - December              | 2,416,083                                                   | 92.4                       | 92.4                       | 1,725,579                                                | 93.2                       | 93.2                       | 690,504                                        | 90.4 |
| <b>Reporting country</b>        |                                                             |                            |                            |                                                          |                            |                            |                                                |      |
| Czechia                         | 549,539                                                     | 21.0                       | 21.0                       | 535,335                                                  | 28.9                       | 28.9                       | 14,204                                         | 1.9  |
| Finland                         | 23,911                                                      | 0.9                        | 0.9                        | 19,820                                                   | 1.1                        | 1.1                        | 4,091                                          | 0.5  |
| Ireland                         | 51,423                                                      | 2.0                        | 2.0                        | 13,535                                                   | 0.7                        | 0.7                        | 37,888                                         | 5.0  |
| Italy                           | 1,643,509                                                   | 62.9                       | 62.9                       | 1,175,593                                                | 63.5                       | 63.5                       | 467,916                                        | 61.3 |
| Luxembourg                      | 20,779                                                      | 0.8                        | 0.8                        | 13,644                                                   | 0.7                        | 0.7                        | 7,135                                          | 0.9  |
| Malta                           | 10,823                                                      | 0.4                        | 0.4                        | 164                                                      | 0.0                        | 0.0                        | 10,659                                         | 1.4  |
| Norway                          | 32,985                                                      | 1.3                        | 1.3                        | 22,941                                                   | 1.2                        | 1.2                        | 10,044                                         | 1.3  |
| Poland                          | 130,402                                                     | 5.0                        | 5.0                        | 33,240                                                   | 1.8                        | 1.8                        | 97,162                                         | 12.7 |
| Slovakia                        | 151,510                                                     | 5.8                        | 5.8                        | 36,935                                                   | 2.0                        | 2.0                        | 114,575                                        | 15.0 |

<sup>1</sup>TESSy: The European Surveillance System, NA: Not available

**Table S3 Number of cases, total and with outcome, by age group included in the age-interaction models for hospitalisation**

|                                      | Age group (years) |                |                |                 |                 |                |                |                 |
|--------------------------------------|-------------------|----------------|----------------|-----------------|-----------------|----------------|----------------|-----------------|
|                                      | <20 years         | 20-29          | 30-39          | 40-49           | 50-59           | 60-69          | 70-79          | ≥80             |
|                                      | N (n)             | N (n)          | N (n)          | N (n)           | N (n)           | N (n)          | N (n)          | N (n)           |
| No underlying condition (reference)  | 87,707 (1,031)    | 92,087 (1,375) | 97,849 (2,247) | 116,970 (3,409) | 110,629 (5,619) | 60,411 (6,942) | 36,094 (8,120) | 36,466 (10,607) |
| Asthma                               | 231 (6)           | 293 (5)        | 290 (12)       | 310 (18)        | 225 (24)        | 117 (15)       | 41 (12)        | 18 (8)          |
| Cancer                               | 162 (49)          | 235 (21)       | 561 (55)       | 1,519 (146)     | 3,395 (449)     | 3,731 (917)    | 4,212 (1,494)  | 4,019 (1,582)   |
| Cardiac disorder                     | 323 (22)          | 317 (22)       | 755 (83)       | 2,789 (324)     | 7,431 (1,197)   | 8,514 (2,035)  | 8,003 (3,016)  | 11,527 (5,200)  |
| Diabetes                             | 260 (25)          | 395 (35)       | 1,095 (127)    | 1,926 (290)     | 3,520 (785)     | 5,000 (1,477)  | 5,584 (2,254)  | 6,215 (2,620)   |
| Hypertension                         | 29 (4)            | 37 (1)         | 145 (7)        | 487 (18)        | 866 (54)        | 671 (53)       | 331 (52)       | 180 (52)        |
| Immune deficiency disorder           | 45 (3)            | 82 (3)         | 108 (13)       | 143 (18)        | 193 (36)        | 94 (25)        | 59 (28)        | 25 (7)          |
| Kidney disease                       | 69 (7)            | 70 (10)        | 136 (29)       | 215 (48)        | 323 (101)       | 375 (157)      | 369 (197)      | 365 (210)       |
| Liver disease                        | 19 (2)            | 41 (3)         | 125 (9)        | 270 (34)        | 389 (44)        | 262 (64)       | 108 (30)       | 69 (15)         |
| Lung disease                         | 1,457 (28)        | 1,373 (39)     | 1,212 (69)     | 1,794 (129)     | 2,048 (249)     | 1,385 (332)    | 1,039 (392)    | 1,050 (458)     |
| Neurological disorders               | 176 (17)          | 188 (15)       | 288 (30)       | 366 (46)        | 463 (82)        | 389 (118)      | 520 (174)      | 980 (365)       |
| Obesity                              | 71 (1)            | 209 (11)       | 277 (7)        | 351 (22)        | 355 (37)        | 146 (19)       | 60 (15)        | 31 (14)         |
| Any underlying condition (≥1)        | 3,598 (205)       | 5,587 (235)    | 7,501 (564)    | 12,667 (1,308)  | 22,431 (3,487)  | 23,715 (5,981) | 22,969 (8,790) | 26,993 (11,735) |
| Number of underlying conditions (1)  | 3,272 (186)       | 5,002 (206)    | 6,701 (504)    | 11,297 (1,151)  | 20,171 (3,147)  | 21,245 (5,322) | 20,684 (7,814) | 24,818 (10,676) |
| Number of underlying conditions (2)  | 299 (14)          | 541 (24)       | 706 (47)       | 1,120 (112)     | 1,703 (216)     | 1,746 (397)    | 1,447 (534)    | 1,279 (608)     |
| Number of underlying conditions (≥3) | 27 (5)            | 44 (5)         | 94 (13)        | 250 (45)        | 557 (124)       | 724 (262)      | 838 (442)      | 896 (451)       |

N: number of cases included in the analysis; n: number of outcomes (hospitalisations)

**Table S4 Number of cases, total and with outcome, by age group included in the age-interaction models for death**

|                                      | Age group (years) |            |             |              |               |                |                |                |
|--------------------------------------|-------------------|------------|-------------|--------------|---------------|----------------|----------------|----------------|
|                                      | <20 years         | 20-29      | 30-39       | 40-49        | 50-59         | 60-69          | 70-79          | ≥80            |
|                                      | N (n)             | N (n)      | N (n)       | N (n)        | N (n)         | N (n)          | N (n)          | N (n)          |
| No underlying condition (reference)  | 87,707 (7)        | 92,087 (5) | 97,849 (35) | 116,970 (99) | 110,629 (285) | 60,411 (812)   | 36,094 (1,966) | 36,466 (5,733) |
| Asthma                               | 231 (0)           | 293 (0)    | 290 (0)     | 310 (0)      | 225 (0)       | 117 (2)        | 41 (2)         | 18 (1)         |
| Cancer                               | 162 (6)           | 235 (1)    | 561 (7)     | 1,519 (24)   | 3,395 (76)    | 3,731 (264)    | 4,212 (521)    | 4,019 (854)    |
| Cardiac disorder                     | 323 (0)           | 317 (1)    | 755 (7)     | 2,789 (20)   | 7,431 (97)    | 8,514 (384)    | 8,003 (915)    | 11,527 (2,832) |
| Diabetes                             | 260 (0)           | 395 (0)    | 1,095 (3)   | 1,926 (17)   | 3,520 (89)    | 5,000 (310)    | 5,584 (787)    | 6,215 (1,457)  |
| Hypertension                         | 29 (0)            | 37 (0)     | 145 (0)     | 487 (0)      | 866 (0)       | 671 (1)        | 331 (6)        | 180 (9)        |
| Immune deficiency disorder           | 45 (0)            | 82 (0)     | 108 (1)     | 143 (2)      | 193 (4)       | 94 (8)         | 59 (12)        | 25 (5)         |
| Kidney disease                       | 69 (0)            | 70 (0)     | 136 (3)     | 215 (3)      | 323 (15)      | 375 (46)       | 369 (70)       | 365 (119)      |
| Liver disease                        | 19 (0)            | 41 (0)     | 125 (2)     | 270 (2)      | 389 (9)       | 262 (16)       | 108 (7)        | 69 (12)        |
| Lung disease                         | 1,457 (0)         | 1,373 (1)  | 1,212 (6)   | 1,794 (5)    | 2,048 (19)    | 1,385 (62)     | 1,039 (127)    | 1,050 (263)    |
| Neurological disorders               | 176 (2)           | 188 (2)    | 288 (2)     | 366 (8)      | 463 (20)      | 389 (40)       | 520 (88)       | 980 (278)      |
| Obesity                              | 71 (0)            | 209 (0)    | 277 (0)     | 351 (0)      | 355 (3)       | 146 (4)        | 60 (3)         | 31 (4)         |
| Any underlying condition (≥1)        | 3,598 (9)         | 5,587 (6)  | 7,501 (38)  | 12,667 (92)  | 22,431 (369)  | 23,715 (1,279) | 22,969 (2,778) | 26,993 (6,307) |
| Number of underlying conditions (1)  | 3,272 (8)         | 5,002 (5)  | 6,701 (33)  | 11,297 (84)  | 20,171 (334)  | 21,245 (1,150) | 20,684 (2,553) | 24,818 (5,867) |
| Number of underlying conditions (2)  | 299 (1)           | 541 (1)    | 706 (5)     | 1,120 (5)    | 1,703 (23)    | 1,746 (72)     | 1,447 (102)    | 1,279 (226)    |
| Number of underlying conditions (≥3) | 27 (0)            | 44 (0)     | 94 (0)      | 250 (3)      | 557 (12)      | 724 (57)       | 838 (123)      | 896 (214)      |

N: number of cases included in the analysis; n: number of outcomes (death)

**Table S5 Number of cases, total and with outcome, by age group included in the age-interaction models for in-hospital deaths**

|                                      | Age group (years) |           |            |            |             |               |               |                |
|--------------------------------------|-------------------|-----------|------------|------------|-------------|---------------|---------------|----------------|
|                                      | <20 years         | 20-29     | 30-39      | 40-49      | 50-59       | 60-69         | 70-79         | ≥80            |
|                                      | N (n)             | N (n)     | N (n)      | N (n)      | N (n)       | N (n)         | N (n)         | N (n)          |
| No underlying condition (reference)  | 1,031 (5)         | 1,375 (4) | 2,247 (22) | 3,409 (74) | 5,619 (223) | 6,942 (669)   | 8,120 (1,539) | 10,607 (3,774) |
| Asthma                               | 6 (0)             | 5 (0)     | 12 (0)     | 18 (0)     | 24 (0)      | 15 (2)        | 12 (1)        | 8 (1)          |
| Cancer                               | 49 (5)            | 21 (1)    | 55 (6)     | 146 (23)   | 449 (68)    | 917 (214)     | 1,494 (431)   | 1,582 (629)    |
| Cardiac disorder                     | 22 (0)            | 22 (1)    | 83 (6)     | 324 (19)   | 1,197 (92)  | 2,035 (356)   | 3,016 (824)   | 5,200 (2,315)  |
| Diabetes                             | 25 (0)            | 35 (0)    | 127 (3)    | 290 (16)   | 785 (83)    | 1,477 (279)   | 2,254 (687)   | 2,620 (1,145)  |
| Hypertension                         | 4 (0)             | 1 (0)     | 7 (0)      | 18 (0)     | 54 (0)      | 53 (1)        | 52 (5)        | 52 (7)         |
| Immune deficiency disorder           | 3 (0)             | 3 (0)     | 13 (1)     | 18 (1)     | 36 (4)      | 25 (8)        | 28 (12)       | 7 (3)          |
| Kidney disease                       | 7 (0)             | 10 (0)    | 29 (3)     | 48 (3)     | 101 (13)    | 157 (42)      | 197 (64)      | 210 (105)      |
| Liver disease                        | 2 (0)             | 3 (0)     | 9 (2)      | 34 (2)     | 44 (6)      | 64 (13)       | 30 (3)        | 15 (5)         |
| Lung disease                         | 28 (0)            | 39 (0)    | 69 (6)     | 129 (4)    | 249 (17)    | 332 (58)      | 392 (103)     | 458 (204)      |
| Neurological disorders               | 17 (2)            | 15 (1)    | 30 (1)     | 46 (8)     | 82 (18)     | 118 (36)      | 174 (69)      | 365 (197)      |
| Obesity                              | 1 (0)             | 11 (0)    | 7 (0)      | 22 (0)     | 37 (2)      | 19 (4)        | 15 (3)        | 14 (3)         |
| Any underlying condition (≥1)        | 205 (8)           | 235 (4)   | 564 (34)   | 1,308 (87) | 3,487 (333) | 5,981 (1,146) | 8,790 (2,409) | 11,735 (4,979) |
| Number of underlying conditions (1)  | 186 (7)           | 206 (3)   | 504 (30)   | 1,151 (79) | 3,147 (304) | 5,322 (1,025) | 7,814 (2,215) | 10,676 (4,647) |
| Number of underlying conditions (2)  | 14 (1)            | 24 (1)    | 47 (4)     | 112 (5)    | 216 (18)    | 397 (67)      | 534 (87)      | 608 (183)      |
| Number of underlying conditions (≥3) | 5 (0)             | 5 (0)     | 13 (0)     | 45 (3)     | 124 (11)    | 262 (54)      | 442 (107)     | 451 (149)      |

N: number of cases included in the analysis; n: number of outcomes (in-hospital death)

**Table S6 Predicted probabilities of hospitalisation for each underlying conditions and exposure compared to COVID-19 cases without an underlying condition, 2 June – 13 December 2020**

|                            | Variable value* | Age group, PP% (CI) |                    |                     |                     |                     |                     |                     |                     |
|----------------------------|-----------------|---------------------|--------------------|---------------------|---------------------|---------------------|---------------------|---------------------|---------------------|
|                            |                 | <20 years           | 20-29              | 30-39               | 40-49               | 50-59               | 60-69               | 70-79               | ≥80                 |
| Asthma                     | 0               | 1.22 (1.13-1.31)    | 1.50 (1.40-1.60)   | 2.27 (2.14-2.42)    | 3.02 (2.86-3.19)    | 5.30 (5.04-5.58)    | 11.92 (11.37-12.50) | 23.83 (22.86-24.82) | 32.35 (31.18-33.53) |
| Asthma                     | 1               | 2.39 (1.06-5.27)    | 1.75 (0.72-4.16)   | 4.35 (2.46-7.57)    | 6.48 (4.09-10.14)   | 11.70 (7.86-17.06)  | 14.50 (8.88-22.79)  | 34.39 (20.68-51.31) | 48.23 (26.40-70.76) |
| Cancer                     | 0               | 1.25 (1.16-1.35)    | 1.54 (1.44-1.65)   | 2.34 (2.20-2.48)    | 3.11 (2.94-3.28)    | 5.46 (5.19-5.74)    | 12.23 (11.67-12.81) | 24.39 (23.43-25.39) | 33.12 (31.96-34.31) |
| Cancer                     | 1               | 31.84 (24.87-39.74) | 8.84 (5.80-13.25)  | 10.33 (7.97-13.28)  | 10.75 (9.15-12.58)  | 14.70 (13.36-16.14) | 25.62 (23.96-27.36) | 36.42 (34.60-38.29) | 41.37 (39.43-43.33) |
| Cardiac disorder           | 0               | 1.21 (1.12-1.30)    | 1.49 (1.39-1.59)   | 2.27 (2.14-2.41)    | 3.01 (2.85-3.17)    | 5.27 (5.02-5.54)    | 11.84 (11.31-12.38) | 23.64 (22.73-24.58) | 32.16 (31.05-33.28) |
| Cardiac disorder           | 1               | 6.26 (4.13-9.38)    | 6.21 (4.09-9.30)   | 9.92 (8.01-12.22)   | 10.45 (9.34-11.68)  | 14.81 (13.86-15.80) | 22.14 (21.00-23.33) | 36.49 (35.01-38.00) | 46.75 (45.28-48.22) |
| Diabetes                   | 0               | 1.17 (1.09-1.26)    | 1.44 (1.35-1.54)   | 2.19 (2.06-2.32)    | 2.91 (2.75-3.07)    | 5.10 (4.85-5.37)    | 11.49 (10.97-12.03) | 23.06 (22.15-24.01) | 31.44 (30.33-32.58) |
| Diabetes                   | 1               | 9.39 (6.38-13.60)   | 8.63 (6.23-11.85)  | 12.13 (10.23-14.33) | 14.34 (12.77-16.07) | 20.60 (19.13-22.14) | 27.85 (26.33-29.43) | 39.69 (37.98-41.42) | 43.50 (41.79-45.22) |
| Hypertension               | 0               | 1.23 (1.14-1.32)    | 1.51 (1.41-1.62)   | 2.30 (2.17-2.44)    | 3.06 (2.89-3.23)    | 5.36 (5.10-5.64)    | 12.04 (11.50-12.60) | 24.03 (23.09-25.00) | 32.59 (31.46-33.74) |
| Hypertension               | 1               | 18.85 (7.43-40.19)  | 3.35 (0.47-20.43)  | 5.52 (2.65-11.17)   | 4.56 (2.88-7.14)    | 7.36 (5.65-9.53)    | 9.02 (6.92-11.66)   | 19.25 (14.94-24.44) | 37.06 (29.68-45.10) |
| Immune deficiency disorder | 0               | 1.24 (1.15-1.34)    | 1.53 (1.43-1.64)   | 2.32 (2.19-2.47)    | 3.09 (2.92-3.27)    | 5.42 (5.14-5.71)    | 12.16 (11.59-12.75) | 24.23 (23.24-25.26) | 32.84 (31.64-34.06) |
| Immune deficiency disorder | 1               | 6.86 (2.22-19.33)   | 3.74 (1.20-11.02)  | 12.73 (7.49-20.81)  | 13.89 (8.89-21.05)  | 20.32 (14.98-26.96) | 27.30 (19.05-37.46) | 49.42 (36.59-62.33) | 31.10 (15.66-52.31) |
| Kidney disease             | 0               | 1.24 (1.15-1.34)    | 1.53 (1.42-1.64)   | 2.32 (2.18-2.47)    | 3.08 (2.91-3.26)    | 5.41 (5.13-5.69)    | 12.13 (11.57-12.72) | 24.19 (23.21-25.21) | 32.77 (31.59-33.98) |
| Kidney disease             | 1               | 11.11 (5.37-21.57)  | 12.92 (6.97-22.72) | 18.80 (13.19-26.08) | 21.78 (16.66-27.95) | 30.31 (25.40-35.72) | 40.73 (35.65-46.01) | 53.02 (47.66-58.31) | 59.15 (53.81-64.27) |
| Liver disease              | 0               | 1.25 (1.16-1.35)    | 1.54 (1.44-1.65)   | 2.34 (2.20-2.49)    | 3.11 (2.94-3.29)    | 5.46 (5.19-5.75)    | 12.25 (11.68-12.85) | 24.41 (23.42-25.43) | 33.06 (31.87-34.27) |
| Liver disease              | 1               | 11.90 (3.00-37.14)  | 6.85 (2.19-19.42)  | 7.08 (3.70-13.14)   | 12.70 (9.16-17.34)  | 11.32 (8.48-14.94)  | 25.34 (20.25-31.21) | 29.22 (21.18-38.80) | 24.49 (15.39-36.65) |
| Lung disease               | 0               | 1.26 (1.17-1.36)    | 1.55 (1.45-1.66)   | 2.36 (2.22-2.51)    | 3.13 (2.96-3.31)    | 5.50 (5.23-5.79)    | 12.32 (11.76-12.91) | 24.54 (23.56-25.54) | 33.25 (32.07-34.45) |
| Lung disease               | 1               | 2.01 (1.38-2.90)    | 2.98 (2.17-4.07)   | 5.97 (4.72-7.54)    | 8.03 (6.76-9.52)    | 13.04 (11.52-14.73) | 25.21 (22.77-27.82) | 39.44 (36.24-42.73) | 46.39 (43.10-49.71) |



|                                       |          |                     |                    |                    |                     |                     |                     |                     |                     |
|---------------------------------------|----------|---------------------|--------------------|--------------------|---------------------|---------------------|---------------------|---------------------|---------------------|
| Neurological disorders                | 0        | 1.25 (1.16-1.35)    | 1.54 (1.44-1.65)   | 2.34 (2.20-2.49)   | 3.11 (2.94-3.29)    | 5.45 (5.17-5.74)    | 12.22 (11.65-12.82) | 24.35 (23.36-25.37) | 32.98 (31.79-34.20) |
| Neurological disorders                | 1        | 9.56 (5.99-14.94)   | 8.35 (5.07-13.45)  | 11.08 (7.81-15.49) | 13.63 (10.31-17.79) | 18.79 (15.31-22.84) | 31.05 (26.45-36.06) | 35.58 (31.32-40.08) | 41.74 (38.37-45.20) |
| Obesity                               | 0        | 1.25 (1.15-1.34)    | 1.53 (1.43-1.64)   | 2.33 (2.19-2.47)   | 3.09 (2.92-3.27)    | 5.43 (5.16-5.72)    | 12.18 (11.61-12.77) | 24.27 (23.29-25.28) | 32.88 (31.70-34.09) |
| Obesity                               | 1        | 1.48 (0.21-9.81)    | 4.66 (2.55-8.36)   | 2.59 (1.22-5.40)   | 6.14 (3.99-9.32)    | 10.64 (7.63-14.66)  | 15.16 (9.71-22.91)  | 33.81 (21.70-48.48) | 55.45 (37.31-72.24) |
| Any underlying condition ( $\geq 1$ ) | 0        | 1.16 (1.08-1.23)    | 1.43 (1.35-1.51)   | 2.17 (2.07-2.27)   | 2.87 (2.76-2.99)    | 5.04 (4.87-5.22)    | 11.33 (10.98-11.70) | 22.78 (22.15-23.42) | 31.21 (30.46-31.97) |
| Any underlying condition ( $\geq 1$ ) | 1        | 5.69 (4.97-6.51)    | 4.36 (3.84-4.95)   | 7.76 (7.15-8.42)   | 10.32 (9.76-10.90)  | 14.99 (14.45-15.54) | 23.84 (23.16-24.54) | 37.29 (36.44-38.15) | 44.55 (43.68-45.43) |
| Number of underlying conditions       | 0        | 1.10 (1.03-1.17)    | 1.36 (1.28-1.44)   | 2.06 (1.96-2.16)   | 2.72 (2.61-2.84)    | 4.78 (4.61-4.96)    | 10.78 (10.43-11.15) | 21.76 (21.13-22.41) | 29.90 (29.14-30.68) |
| Number of underlying conditions       | 1        | 5.36 (4.65-6.18)    | 4.11 (3.58-4.70)   | 7.38 (6.77-8.05)   | 9.64 (9.08-10.23)   | 14.26 (13.70-14.83) | 22.55 (21.84-23.29) | 35.17 (34.26-36.09) | 42.30 (41.36-43.25) |
| Number of underlying conditions       | 2        | 6.28 (3.75-10.34)   | 5.49 (3.70-8.08)   | 8.20 (6.20-10.77)  | 11.22 (9.38-13.36)  | 13.19 (11.60-14.96) | 22.21 (20.25-24.30) | 37.60 (35.00-40.28) | 50.80 (47.89-53.70) |
| Number of underlying conditions       | $\geq 3$ | 23.81 (10.39-45.72) | 12.71 (5.35-27.29) | 15.62 (9.25-25.15) | 20.62 (15.72-26.56) | 23.88 (20.34-27.83) | 37.00 (33.39-40.77) | 56.66 (53.13-60.11) | 57.02 (53.61-60.36) |

\*0 indicates no underlying health condition, reference group; Probabilities were estimated from the fully adjusted age-interaction models. Baseline risks may therefore vary between the different models. CI: Confidence interval; NA: Not available as no outcome occurred within the age group, PP: predicted probabilities.

**Table S7 Predicted probabilities of death for each underlying conditions and exposure compared to COVID-19 cases without an underlying condition, 2 June – 13 December 2020**

|                            | Variable value* | Age group, PP% (CI) |                  |                  |                  |                  |                  |                   |                     |
|----------------------------|-----------------|---------------------|------------------|------------------|------------------|------------------|------------------|-------------------|---------------------|
|                            |                 | <20 years           | 20-29            | 30-39            | 40-49            | 50-59            | 60-69            | 70-79             | ≥80                 |
| Asthma                     | 0               | 0.00 (0.00-0.01)    | 0.00 (0.00-0.00) | 0.01 (0.01-0.02) | 0.03 (0.02-0.04) | 0.09 (0.07-0.12) | 0.47 (0.37-0.61) | 1.94 (1.52-2.48)  | 6.40 (5.07-8.04)    |
| Asthma                     | 1               | NA                  | NA               | NA               | NA               | NA               | 0.79 (0.19-3.21) | 3.02 (0.71-11.95) | 2.93 (0.38-19.47)   |
| Cancer                     | 0               | 0.00 (0.00-0.01)    | 0.00 (0.00-0.01) | 0.02 (0.01-0.02) | 0.04 (0.03-0.05) | 0.11 (0.09-0.14) | 0.56 (0.45-0.69) | 2.28 (1.84-2.81)  | 7.47 (6.12-9.08)    |
| Cancer                     | 1               | 1.44 (0.62-3.29)    | 0.16 (0.02-1.15) | 0.52 (0.24-1.12) | 0.69 (0.44-1.08) | 0.95 (0.70-1.29) | 2.78 (2.19-3.52) | 4.76 (3.82-5.93)  | 9.13 (7.42-11.17)   |
| Cardiac disorder           | 0               | 0.00 (0.00-0.01)    | 0.00 (0.00-0.01) | 0.02 (0.01-0.02) | 0.04 (0.03-0.05) | 0.11 (0.09-0.13) | 0.56 (0.46-0.67) | 2.28 (1.91-2.73)  | 7.48 (6.33-8.81)    |
| Cardiac disorder           | 1               | NA                  | 0.12 (0.02-0.86) | 0.38 (0.18-0.82) | 0.28 (0.18-0.45) | 0.49 (0.37-0.63) | 1.71 (1.40-2.09) | 4.66 (3.89-5.57)  | 11.97 (10.19-14.02) |
| Diabetes                   | 0               | 0.00 (0.00-0.01)    | 0.00 (0.00-0.00) | 0.01 (0.01-0.02) | 0.03 (0.02-0.04) | 0.09 (0.07-0.11) | 0.44 (0.35-0.57) | 1.83 (1.44-2.32)  | 6.02 (4.79-7.53)    |
| Diabetes                   | 1               | NA                  | NA               | 0.10 (0.03-0.31) | 0.28 (0.16-0.47) | 0.71 (0.52-0.98) | 1.76 (1.35-2.28) | 4.37 (3.44-5.55)  | 8.67 (6.90-10.83)   |
| Hypertension               | 0               | 0.00 (0.00-0.01)    | 0.00 (0.00-0.00) | 0.01 (0.01-0.02) | 0.03 (0.02-0.04) | 0.09 (0.07-0.11) | 0.45 (0.35-0.58) | 1.84 (1.43-2.36)  | 6.07 (4.78-7.69)    |
| Hypertension               | 1               | NA                  | NA               | NA               | NA               | NA               | 0.08 (0.01-0.56) | 1.04 (0.45-2.41)  | 3.21 (1.57-6.44)    |
| Immune deficiency disorder | 0               | 0.00 (0.00-0.01)    | 0.00 (0.00-0.00) | 0.01 (0.01-0.02) | 0.03 (0.02-0.04) | 0.09 (0.07-0.12) | 0.47 (0.36-0.60) | 1.92 (1.49-2.46)  | 6.32 (4.97-7.99)    |
| Immune deficiency disorder | 1               | NA                  | NA               | 0.35 (0.05-2.52) | 0.55 (0.13-2.24) | 0.75 (0.27-2.07) | 3.06 (1.44-6.38) | 7.92 (4.14-14.63) | 8.43 (3.18-20.51)   |
| Kidney disease             | 0               | 0.00 (0.00-0.01)    | 0.00 (0.00-0.00) | 0.01 (0.01-0.02) | 0.03 (0.02-0.04) | 0.09 (0.07-0.12) | 0.48 (0.37-0.62) | 1.97 (1.55-2.50)  | 6.47 (5.15-8.10)    |
| Kidney disease             | 1               | NA                  | NA               | 0.76 (0.24-2.41) | 0.48 (0.15-1.52) | 1.63 (0.93-2.85) | 4.74 (3.26-6.84) | 7.55 (5.42-10.44) | 14.64 (11.00-19.21) |
| Liver disease              | 0               | 0.00 (0.00-0.01)    | 0.00 (0.00-0.00) | 0.01 (0.01-0.02) | 0.03 (0.02-0.04) | 0.09 (0.07-0.12) | 0.47 (0.36-0.60) | 1.92 (1.49-2.46)  | 6.31 (4.97-7.98)    |
| Liver disease              | 1               | NA                  | NA               | 0.56 (0.13-2.26) | 0.24 (0.06-0.98) | 0.69 (0.34-1.38) | 1.96 (1.12-3.40) | 2.09 (0.94-4.58)  | 6.42 (3.37-11.90)   |
| Lung disease               | 0               | 0.00 (0.00-0.01)    | 0.00 (0.00-0.01) | 0.01 (0.01-0.02) | 0.03 (0.02-0.04) | 0.10 (0.07-0.12) | 0.50 (0.39-0.63) | 2.04 (1.62-2.56)  | 6.71 (5.40-8.30)    |
| Lung disease               | 1               | NA                  | 0.03 (0.00-0.22) | 0.19 (0.08-0.45) | 0.11 (0.04-0.27) | 0.34 (0.21-0.57) | 1.68 (1.20-2.35) | 4.61 (3.47-6.08)  | 10.73 (8.42-13.59)  |

|                                       |          |                  |                  |                  |                  |                  |                   |                     |                     |
|---------------------------------------|----------|------------------|------------------|------------------|------------------|------------------|-------------------|---------------------|---------------------|
| Neurological disorders                | 0        | 0.00 (0.00-0.01) | 0.00 (0.00-0.00) | 0.01 (0.01-0.02) | 0.03 (0.02-0.04) | 0.09 (0.07-0.12) | 0.48 (0.37-0.62)  | 1.97 (1.53-2.54)    | 6.47 (5.07-8.22)    |
| Neurological disorders                | 1        | 0.36 (0.09-1.49) | 0.39 (0.09-1.59) | 0.26 (0.06-1.06) | 0.80 (0.38-1.67) | 1.56 (0.94-2.60) | 3.72 (2.48-5.54)  | 6.80 (4.91-9.35)    | 13.71 (10.60-17.56) |
| Obesity                               | 0        | 0.00 (0.00-0.01) | 0.00 (0.00-0.00) | 0.01 (0.01-0.02) | 0.03 (0.02-0.04) | 0.09 (0.07-0.12) | 0.46 (0.36-0.60)  | 1.89 (1.47-2.43)    | 6.24 (4.91-7.90)    |
| Obesity                               | 1        | NA               | NA               | NA               | NA               | 0.94 (0.27-3.24) | 3.81 (1.20-11.39) | 7.56 (2.06-24.18)   | 20.99 (6.86-48.96)  |
| Any underlying condition ( $\geq 1$ ) | 0        | 0.00 (0.00-0.01) | 0.00 (0.00-0.01) | 0.02 (0.02-0.03) | 0.05 (0.04-0.07) | 0.16 (0.14-0.18) | 0.82 (0.75-0.90)  | 3.36 (3.12-3.62)    | 10.79 (10.16-11.46) |
| Any underlying condition ( $\geq 1$ ) | 1        | 0.16 (0.08-0.31) | 0.08 (0.04-0.18) | 0.37 (0.27-0.51) | 0.50 (0.40-0.62) | 1.03 (0.92-1.16) | 3.26 (3.02-3.52)  | 7.50 (7.03-8.00)    | 16.31 (15.44-17.21) |
| Number of underlying conditions       | 0        | 0.00 (0.00-0.01) | 0.00 (0.00-0.01) | 0.02 (0.01-0.03) | 0.05 (0.04-0.06) | 0.13 (0.12-0.15) | 0.69 (0.62-0.76)  | 2.82 (2.60-3.05)    | 9.12 (8.51-9.76)    |
| Number of underlying conditions       | 1        | 0.14 (0.07-0.28) | 0.07 (0.03-0.16) | 0.31 (0.22-0.44) | 0.42 (0.34-0.53) | 0.84 (0.74-0.96) | 2.63 (2.41-2.88)  | 6.16 (5.71-6.65)    | 13.55 (12.68-14.47) |
| Number of underlying conditions       | 2        | 0.26 (0.04-1.81) | 0.17 (0.02-1.21) | 0.66 (0.27-1.58) | 0.43 (0.18-1.04) | 1.28 (0.85-1.93) | 3.76 (2.98-4.75)  | 6.92 (5.68-8.39)    | 19.52 (17.19-22.09) |
| Number of underlying conditions       | $\geq 3$ | NA               | NA               | NA               | 1.42 (0.46-4.33) | 2.44 (1.38-4.25) | 8.01 (6.19-10.31) | 15.85 (13.34-18.74) | 27.56 (24.37-30.99) |

\*0 indicates no underlying health condition, reference group; Probabilities were estimated from the fully adjusted age-interaction models. Baseline risks may therefore vary between the different models. CI: Confidence interval; NA: Not available as no outcome occurred within the age group, PP: predicted probabilities

**Table S8 Predicted probabilities of in-hospital death for each underlying conditions and exposure compared to COVID-19 cases without an underlying condition, 2 June – 13 December 2020**

|                            | Variable value* | Age group, PP% (CI) |                   |                    |                   |                   |                    |                    |                     |
|----------------------------|-----------------|---------------------|-------------------|--------------------|-------------------|-------------------|--------------------|--------------------|---------------------|
|                            |                 | <20, years          | 20-29             | 30-39              | 40-49             | 50-59             | 60-69              | 70-79              | ≥80                 |
| Asthma                     | 0               | 0.17 (0.07-0.43)    | 0.11 (0.04-0.31)  | 0.37 (0.22-0.61)   | 0.75 (0.52-1.08)  | 1.29 (0.94-1.75)  | 3.28 (2.47-4.36)   | 6.96 (5.31-9.09)   | 15.20 (11.86-19.28) |
| Asthma                     | 1               | NA                  | NA                | NA                 | NA                | NA                | 7.30 (1.63-27.15)  | 3.92 (0.48-25.52)  | 8.04 (1.01-42.73)   |
| Cancer                     | 0               | 0.20 (0.08-0.50)    | 0.13 (0.05-0.36)  | 0.43 (0.27-0.70)   | 0.88 (0.63-1.22)  | 1.51 (1.14-1.99)  | 3.84 (2.99-4.92)   | 8.09 (6.40-10.19)  | 17.39 (14.08-21.30) |
| Cancer                     | 1               | 3.94 (1.54-9.70)    | 1.94 (0.26-13.09) | 4.67 (1.98-10.64)  | 6.47 (3.98-10.34) | 6.15 (4.38-8.58)  | 9.53 (7.29-12.35)  | 11.88 (9.31-15.03) | 18.21 (14.55-22.55) |
| Cardiac disorder           | 0               | 0.20 (0.08-0.49)    | 0.13 (0.05-0.36)  | 0.43 (0.27-0.69)   | 0.88 (0.64-1.20)  | 1.51 (1.18-1.94)  | 3.84 (3.08-4.79)   | 8.10 (6.60-9.92)   | 17.47 (14.54-20.84) |
| Cardiac disorder           | 1               | NA                  | 2.12 (0.28-14.09) | 2.93 (1.26-6.67)   | 2.18 (1.32-3.59)  | 2.69 (2.00-3.61)  | 6.83 (5.43-8.56)   | 11.83 (9.64-14.43) | 23.13 (19.43-27.29) |
| Diabetes                   | 0               | 0.17 (0.07-0.42)    | 0.11 (0.04-0.30)  | 0.36 (0.22-0.59)   | 0.73 (0.51-1.04)  | 1.25 (0.93-1.69)  | 3.20 (2.43-4.21)   | 6.79 (5.23-8.78)   | 14.83 (11.68-18.65) |
| Diabetes                   | 1               | NA                  | NA                | 0.72 (0.22-2.30)   | 1.62 (0.92-2.84)  | 3.05 (2.15-4.29)  | 5.79 (4.34-7.67)   | 10.51 (8.10-13.54) | 18.04 (14.21-22.63) |
| Hypertension               | 0               | 0.16 (0.07-0.41)    | 0.11 (0.04-0.30)  | 0.35 (0.21-0.59)   | 0.72 (0.50-1.04)  | 1.24 (0.91-1.69)  | 3.16 (2.37-4.21)   | 6.72 (5.11-8.79)   | 14.72 (11.45-18.72) |
| Hypertension               | 1               | NA                  | NA                | NA                 | NA                | NA                | 0.67 (0.09-4.81)   | 5.18 (1.94-13.10)  | 8.56 (3.68-18.66)   |
| Immune deficiency disorder | 0               | 0.17 (0.07-0.42)    | 0.11 (0.04-0.31)  | 0.36 (0.22-0.60)   | 0.73 (0.50-1.05)  | 1.25 (0.91-1.72)  | 3.20 (2.38-4.29)   | 6.79 (5.13-8.95)   | 14.87 (11.49-19.02) |
| Immune deficiency disorder | 1               | NA                  | NA                | 3.18 (0.41-20.88)  | 1.99 (0.26-13.59) | 3.52 (1.21-9.77)  | 12.07 (5.25-25.36) | 18.12 (8.95-33.24) | 17.98 (4.52-50.40)  |
| Kidney disease             | 0               | 0.18 (0.07-0.45)    | 0.12 (0.04-0.33)  | 0.38 (0.23-0.63)   | 0.78 (0.55-1.11)  | 1.34 (0.99-1.81)  | 3.42 (2.58-4.51)   | 7.23 (5.55-9.37)   | 15.72 (12.36-19.80) |
| Kidney disease             | 1               | NA                  | NA                | 3.94 (1.18-12.37)  | 2.24 (0.68-7.11)  | 5.01 (2.68-9.16)  | 11.82 (7.87-17.39) | 14.24 (9.93-19.99) | 25.43 (18.77-33.49) |
| Liver disease              | 0               | 0.17 (0.07-0.43)    | 0.11 (0.04-0.31)  | 0.37 (0.22-0.60)   | 0.74 (0.52-1.07)  | 1.28 (0.94-1.74)  | 3.26 (2.44-4.34)   | 6.92 (5.26-9.06)   | 15.13 (11.77-19.23) |
| Liver disease              | 1               | NA                  | NA                | 10.61 (2.24-38.05) | 2.15 (0.51-8.69)  | 4.59 (1.90-10.68) | 7.43 (3.91-13.64)  | 3.26 (0.97-10.38)  | 12.06 (4.29-29.55)  |
| Lung disease               | 0               | 0.16 (0.07-0.41)    | 0.11 (0.04-0.30)  | 0.35 (0.21-0.58)   | 0.72 (0.50-1.03)  | 1.23 (0.91-1.67)  | 3.15 (2.38-4.16)   | 6.69 (5.12-8.68)   | 14.67 (11.50-18.54) |
| Lung disease               | 1               | NA                  | NA                | 3.13 (1.31-7.28)   | 0.97 (0.35-2.70)  | 2.06 (1.18-3.57)  | 6.25 (4.29-9.02)   | 9.78 (7.05-13.41)  | 19.96 (15.16-25.81) |

|                                 |    |                   |                   |                   |                   |                   |                     |                     |                     |
|---------------------------------|----|-------------------|-------------------|-------------------|-------------------|-------------------|---------------------|---------------------|---------------------|
| Neurological disorders          | 0  | 0.17 (0.07-0.42)  | 0.11 (0.04-0.31)  | 0.36 (0.22-0.60)  | 0.74 (0.51-1.07)  | 1.27 (0.93-1.74)  | 3.25 (2.42-4.34)    | 6.88 (5.20-9.04)    | 15.00 (11.62-19.15) |
| Neurological disorders          | 1  | 4.28 (0.95-17.21) | 2.58 (0.34-17.20) | 1.05 (0.14-7.42)  | 7.00 (3.18-14.70) | 7.85 (4.44-13.49) | 12.76 (8.20-19.31)  | 18.27 (12.75-25.48) | 29.18 (22.36-37.10) |
| Obesity                         | 0  | 0.17 (0.07-0.42)  | 0.11 (0.04-0.31)  | 0.36 (0.22-0.60)  | 0.73 (0.51-1.06)  | 1.26 (0.92-1.73)  | 3.21 (2.39-4.30)    | 6.82 (5.15-8.98)    | 14.92 (11.54-19.09) |
| Obesity                         | 1  | NA                | NA                | NA                | NA                | 5.10 (1.11-20.43) | 20.76 (5.96-51.99)  | 19.68 (4.92-53.72)  | 22.12 (5.59-57.67)  |
| Any underlying condition (≥1)   | 0  | 0.29 (0.12-0.69)  | 0.18 (0.07-0.49)  | 0.60 (0.39-0.92)  | 1.24 (0.97-1.57)  | 2.14 (1.84-2.48)  | 5.39 (4.86-5.97)    | 11.17 (10.28-12.12) | 23.11 (21.64-24.65) |
| Any underlying condition (≥1)   | 1  | 2.30 (1.14-4.59)  | 1.20 (0.45-3.16)  | 3.78 (2.68-5.30)  | 3.91 (3.13-4.86)  | 5.29 (4.66-5.99)  | 11.21 (10.29-12.19) | 16.90 (15.74-18.13) | 29.18 (27.56-30.85) |
| Number of underlying conditions | 0  | 0.25 (0.10-0.59)  | 0.16 (0.06-0.42)  | 0.51 (0.34-0.79)  | 1.05 (0.82-1.34)  | 1.81 (1.55-2.11)  | 4.59 (4.11-5.13)    | 9.58 (8.74-10.50)   | 20.17 (18.69-21.73) |
| Number of underlying conditions | 1  | 1.95 (0.92-4.09)  | 0.87 (0.28-2.69)  | 3.09 (2.13-4.45)  | 3.27 (2.58-4.14)  | 4.33 (3.77-4.98)  | 9.11 (8.25-10.06)   | 14.31 (13.14-15.56) | 25.30 (23.57-27.12) |
| Number of underlying conditions | 2  | 3.73 (0.50-23.12) | 3.76 (0.52-22.57) | 7.93 (2.96-19.54) | 4.01 (1.66-9.36)  | 7.72 (4.87-12.01) | 16.05 (12.69-20.11) | 16.44 (13.37-20.05) | 32.05 (28.08-36.29) |
| Number of underlying conditions | 3+ | NA                | NA                | NA                | 7.68 (2.49-21.36) | 9.30 (5.19-16.11) | 22.00 (17.11-27.81) | 26.27 (22.03-31.01) | 37.87 (33.05-42.94) |

\*0 indicates no underlying health condition, reference group; Probabilities were estimated from the fully adjusted age-interaction models. Baseline risks may therefore slightly vary between the different models. CI: Confidence interval; NA: Not available as no outcome occurred within the age group, PP: predicted probabilities

**Table S9 Distribution of study population by age and sex with crude attack rates (AR) for each underlying condition and outcome for the sensitivity analysis, 6 February – 13 December, 2020**

|                                      | Population size | Sex, n (%)    | Age group, n(%) |              |               |               |               |              |              |              | Outcome, n (AR%) |                 |              |
|--------------------------------------|-----------------|---------------|-----------------|--------------|---------------|---------------|---------------|--------------|--------------|--------------|------------------|-----------------|--------------|
|                                      |                 |               | Male            | <20          | 20-29         | 30-39         | 40-49         | 50-59        | 60-69        | 70-79        | ≥80              | Hospitalisation | Death        |
| No underlying condition (reference)  | 693975          | 328543 (47.3) | 90316 (13.0)    | 98341 (14.2) | 105688 (15.2) | 127274 (18.3) | 121709 (17.5) | 66430 (9.6)  | 40265 (5.8)  | 43952 (6.3)  | 52333 (7.5)      | 12084 (1.7)     | 8541 (16.3)  |
| Asthma                               | 1804            | 770 (42.7)    | 253 (14.0)      | 351 (19.5)   | 341 (18.9)    | 387 (21.5)    | 268 (14.9)    | 133 (7.4)    | 47 (2.6)     | 24 (1.3)     | 137 (7.6)        | 6 (0.3)         | 5 (3.6)      |
| Cancer                               | 25252           | 11777 (46.6)  | 185 (0.7)       | 279 (1.1)    | 686 (2.7)     | 1896 (7.5)    | 4360 (17.3)   | 4956 (19.6)  | 6124 (24.3)  | 6766 (26.8)  | 8785 (34.8)      | 3798 (15.0)     | 3090 (35.2)  |
| Cardiac disorder                     | 59390           | 29751 (50.1)  | 364 (0.6)       | 394 (0.7)    | 966 (1.6)     | 3634 (6.1)    | 9840 (16.6)   | 11416 (19.2) | 11995 (20.2) | 20781 (35.0) | 22693 (38.2)     | 9558 (16.1)     | 7929 (34.9)  |
| Diabetes                             | 33272           | 17462 (52.5)  | 282 (0.8)       | 453 (1.4)    | 1235 (3.7)    | 2327 (7.0)    | 4458 (13.4)   | 6583 (19.8)  | 7952 (23.9)  | 9982 (30.0)  | 13038 (39.2)     | 5335 (16.0)     | 4393 (33.7)  |
| Hypertension                         | 3239            | 1538 (47.5)   | 31 (1.0)        | 47 (1.5)     | 175 (5.4)     | 589 (18.2)    | 1019 (31.5)   | 763 (23.6)   | 364 (11.2)   | 251 (7.7)    | 302 (9.3)        | 41 (1.3)        | 18 (6.0)     |
| Immune deficiency disorder           | 1160            | 492 (42.4)    | 50 (4.3)        | 112 (9.7)    | 167 (14.4)    | 232 (20.0)    | 323 (27.8)    | 132 (11.4)   | 89 (7.7)     | 55 (4.7)     | 283 (24.4)       | 70 (6.0)        | 58 (20.5)    |
| Kidney disease                       | 2739            | 1553 (56.7)   | 78 (2.8)        | 92 (3.4)     | 184 (6.7)     | 300 (11.0)    | 425 (15.5)    | 495 (18.1)   | 536 (19.6)   | 629 (23.0)   | 1262 (46.1)      | 479 (17.5)      | 419 (33.2)   |
| Liver disease                        | 1499            | 831 (55.4)    | 22 (1.5)        | 50 (3.3)     | 141 (9.4)     | 313 (20.9)    | 433 (28.9)    | 311 (20.7)   | 132 (8.8)    | 97 (6.5)     | 284 (18.9)       | 75 (5.0)        | 54 (19.0)    |
| Lung disease                         | 14815           | 7043 (47.5)   | 1561 (10.5)     | 1680 (11.3)  | 1552 (10.5)   | 2323 (15.7)   | 2656 (17.9)   | 1820 (12.3)  | 1514 (10.2)  | 1709 (11.5)  | 2911 (19.6)      | 987 (6.7)       | 788 (27.1)   |
| Neurological disorders               | 4613            | 1880 (40.8)   | 182 (3.9)       | 219 (4.7)    | 348 (7.5)     | 452 (9.8)     | 580 (12.6)    | 516 (11.2)   | 772 (16.7)   | 1544 (33.5)  | 1317 (28.5)      | 842 (18.3)      | 536 (40.7)   |
| Obesity                              | 1635            | 820 (50.2)    | 72 (4.4)        | 226 (13.8)   | 311 (19.0)    | 385 (23.5)    | 384 (23.5)    | 162 (9.9)    | 63 (3.9)     | 32 (2.0)     | 163 (10.0)       | 19 (1.2)        | 17 (10.4)    |
| Any underlying condition (≥1)        | 174379          | 85643 (49.1)  | 3898 (2.2)      | 6565 (3.8)   | 9055 (5.2)    | 15838 (9.1)   | 28738 (16.5)  | 31117 (17.8) | 33211 (19.0) | 45957 (26.4) | 57504 (33.0)     | 23357 (13.4)    | 18781 (32.7) |
| Number of underlying conditions (1)  | 157591          | 77492 (49.2)  | 3541 (2.2)      | 5865 (3.7)   | 8086 (5.1)    | 14142 (9.0)   | 25840 (16.4)  | 27902 (17.7) | 29975 (19.0) | 42240 (26.8) | 52053 (33.0)     | 21294 (13.5)    | 17386 (33.4) |
| Number of underlying conditions (2)  | 11647           | 5578 (47.9)   | 326 (2.8)       | 644 (5.5)    | 839 (7.2)     | 1367 (11.7)   | 2157 (18.5)   | 2220 (19.1)  | 1962 (16.8)  | 2132 (18.3)  | 3114 (26.7)      | 1070 (9.2)      | 716 (23.0)   |
| Number of underlying conditions (≥3) | 5141            | 2573 (50.0)   | 31 (0.6)        | 56 (1.1)     | 130 (2.5)     | 329 (6.4)     | 741 (14.4)    | 995 (19.4)   | 1274 (24.8)  | 1585 (30.8)  | 2337 (45.5)      | 993 (19.3)      | 679 (29.1)   |

**Table S10 Age-adjusted and age-stratum specific associations between underlying condition and hospitalisation for the sensitivity analysis, 6 February – 13 December 2020**

|                                      | Age-adjusted model |                      | Age-interaction model, stratum-specific aOR (95% CI) |                 |                |                |               |               |               |               | Interaction p-value <sup>1</sup> |
|--------------------------------------|--------------------|----------------------|------------------------------------------------------|-----------------|----------------|----------------|---------------|---------------|---------------|---------------|----------------------------------|
|                                      | aOR                | p-value <sup>1</sup> | <20                                                  | 20-29           | 30-39          | 40-49          | 50-59         | 60-69         | 70-79         | ≥80           |                                  |
| Asthma                               | 1.8 (1.4-2.3)      | <0.0001              | 2.0 (0.9-4.6)                                        | 1.2 (0.5-2.9)   | 2.0 (1.1-3.5)  | 2.2 (1.4-3.6)  | 2.4 (1.5-3.7) | 1.3 (0.7-2.2) | 1.7 (0.8-3.4) | 1.9 (0.7-5.1) | 0.64                             |
| Cancer                               | 2.0 (1.9-2.1)      | <0.0001              | 36.8 (26.0-52.1)                                     | 6.2 (3.9-9.8)   | 4.8 (3.6-6.4)  | 3.8 (3.1-4.5)  | 3.0 (2.7-3.3) | 2.5 (2.3-2.7) | 1.8 (1.7-1.9) | 1.4 (1.3-1.5) | <0.0001                          |
| Cardiac disorder                     | 2.1 (2.1-2.2)      | <0.0001              | 5.5 (3.5-8.5)                                        | 4.4 (2.8-6.8)   | 4.7 (3.8-6.0)  | 3.8 (3.3-4.3)  | 3.1 (2.9-3.3) | 2.1 (2.0-2.2) | 1.9 (1.8-2.0) | 1.9 (1.8-1.9) | <0.0001                          |
| Diabetes                             | 2.5 (2.4-2.6)      | <0.0001              | 8.8 (5.7-13.3)                                       | 6.5 (4.5-9.2)   | 6.2 (5.1-7.5)  | 5.6 (4.9-6.4)  | 4.8 (4.4-5.3) | 3.0 (2.8-3.2) | 2.2 (2.1-2.3) | 1.7 (1.6-1.8) | <0.0001                          |
| Hypertension                         | 1.0 (0.9-1.2)      | 0.72                 | 18.7 (6.4-54.1)                                      | 2.3 (0.3-16.7)  | 2.5 (1.2-5.4)  | 1.5 (0.9-2.5)  | 1.4 (1.0-1.9) | 0.7 (0.5-1.0) | 0.8 (0.6-1.0) | 1.2 (0.9-1.7) | <0.0001                          |
| Immune deficiency disorder           | 3.6 (2.9-4.4)      | <0.0001              | 5.9 (1.8-19.1)                                       | 2.5 (0.8-8.0)   | 6.1 (3.4-11.1) | 5.1 (3.1-8.4)  | 4.5 (3.1-6.4) | 2.7 (1.7-4.3) | 3.1 (1.8-5.2) | 0.9 (0.4-2.2) | 0.009                            |
| Kidney disease                       | 4.9 (4.4-5.4)      | <0.0001              | 9.9 (4.5-21.9)                                       | 9.6 (4.8-19.0)  | 9.7 (6.4-14.9) | 8.8 (6.3-12.2) | 7.6 (6.0-9.7) | 5.0 (4.0-6.2) | 3.5 (2.9-4.4) | 3.0 (2.4-3.7) | <0.0001                          |
| Liver disease                        | 2.1 (1.8-2.5)      | <0.0001              | 10.6 (2.4-46.6)                                      | 4.7 (1.4-15.4)  | 3.2 (1.6-6.3)  | 4.5 (3.1-6.5)  | 2.2 (1.6-3.0) | 2.4 (1.8-3.2) | 1.3 (0.8-2.0) | 0.7 (0.4-1.2) | <0.0001                          |
| Lung disease                         | 2.2 (2.1-2.3)      | <0.0001              | 1.6 (1.1-2.3)                                        | 1.9 (1.4-2.7)   | 2.6 (2.1-3.4)  | 2.7 (2.2-3.2)  | 2.6 (2.2-3.0) | 2.4 (2.1-2.7) | 2.0 (1.8-2.3) | 1.7 (1.5-2.0) | <0.0001                          |
| Neurological disorders               | 2.2 (2.0-2.4)      | <0.0001              | 8.3 (5.0-13.9)                                       | 5.8 (3.4-9.9)   | 5.2 (3.5-7.6)  | 4.9 (3.6-6.7)  | 4.0 (3.1-5.1) | 3.2 (2.6-4.0) | 1.7 (1.4-2.1) | 1.5 (1.3-1.7) | <0.0001                          |
| Obesity                              | 1.8 (1.4-2.3)      | <0.0001              | 1.2 (0.2-8.6)                                        | 3.1 (1.7-5.9)   | 1.1 (0.5-2.4)  | 2.0 (1.3-3.3)  | 2.1 (1.4-3.0) | 1.3 (0.8-2.2) | 1.6 (0.9-3.0) | 2.5 (1.2-5.3) | 0.29                             |
| Any underlying condition (≥1)        | 2.3 (2.3-2.4)      | <0.0001              | 5.2 (4.4-6.0)                                        | 3.1 (2.7-3.6)   | 3.8 (3.4-4.2)  | 3.9 (3.6-4.2)  | 3.3 (3.2-3.5) | 2.4 (2.4-2.5) | 2.0 (1.9-2.1) | 1.8 (1.7-1.8) | <0.0001                          |
| Number of underlying conditions (1)  | 2.3 (2.3-2.3)      | <0.0001              | 5.1 (4.3-6.0)                                        | 3.1 (2.7-3.6)   | 3.8 (3.4-4.2)  | 3.8 (3.5-4.1)  | 3.3 (3.2-3.5) | 2.4 (2.3-2.5) | 2.0 (1.9-2.0) | 1.7 (1.7-1.8) | <0.0001                          |
| Number of underlying conditions (2)  | 2.6 (2.4-2.8)      | <0.0001              | 6.0 (3.5-10.4)                                       | 4.2 (2.8-6.4)   | 4.2 (3.1-5.8)  | 4.5 (3.7-5.5)  | 3.0 (2.6-3.5) | 2.4 (2.1-2.7) | 2.2 (1.9-2.4) | 2.4 (2.1-2.7) | <0.0001                          |
| Number of underlying conditions (3+) | 4.6 (4.2-5.0)      | <0.0001              | 28.2 (10.4-76.1)                                     | 10.6 (4.1-27.3) | 8.8 (4.8-16.0) | 9.3 (6.6-12.9) | 6.3 (5.1-7.7) | 4.9 (4.1-5.7) | 4.7 (4.1-5.4) | 3.1 (2.7-3.6) | <0.0001                          |

<sup>1</sup>p-values based on likelihood ratio test; aOR: adjusted odds ratio; CI: confidence interval; NA: Not available as no outcome occurred within the age group; Age presented in years

**Table S11 Age-adjusted and age-stratum specific associations between underlying condition and death for the sensitivity analysis, 6 February – 13 December 2020**

|                                      | Age-adjusted model |                      | Age-interaction model, stratum-specific aOR (95% CI) |                     |                   |                   |                  |                 |                |                |                                  |
|--------------------------------------|--------------------|----------------------|------------------------------------------------------|---------------------|-------------------|-------------------|------------------|-----------------|----------------|----------------|----------------------------------|
|                                      | aOR                | p-value <sup>1</sup> | <20                                                  | 20-29               | 30-39             | 40-49             | 50-59            | 60-69           | 70-79          | ≥80            | Interaction p-value <sup>1</sup> |
| Asthma                               | 0.9 (0.4-2.4)      | 0.88                 | NA                                                   | NA                  | NA                | NA                | NA               | 1.7 (0.4-7.0)   | 1.6 (0.4-6.8)  | 0.4 (0.1-3.5)  | 0.88                             |
| Cancer                               | 1.9 (1.8-2.0)      | <0.0001              | 438.6 (145.5-1322.5)                                 | 69.3 (8.1-595.7)    | 33.5 (14.8-75.9)  | 18.9 (12.0-29.6)  | 8.8 (6.8-11.4)   | 5.1 (4.4-5.9)   | 2.1 (1.9-2.4)  | 1.2 (1.1-1.4)  | <0.0001                          |
| Cardiac disorder                     | 1.9 (1.9-2.0)      | <0.0001              | NA                                                   | 52.2 (6.1-448.3)    | 24.6 (10.9-55.7)  | 7.7 (4.7-12.5)    | 4.5 (3.6-5.7)    | 3.1 (2.7-3.5)   | 2.1 (1.9-2.3)  | 1.7 (1.6-1.8)  | <0.0001                          |
| Diabetes                             | 2.0 (1.9-2.1)      | <0.0001              | NA                                                   | NA                  | 7.8 (2.4-25.5)    | 9.5 (5.7-15.9)    | 8.3 (6.5-10.6)   | 4.0 (3.5-4.6)   | 2.5 (2.2-2.7)  | 1.5 (1.4-1.6)  | <0.0001                          |
| Hypertension                         | 0.4 (0.3-0.8)      | 0.0014               | NA                                                   | NA                  | NA                | NA                | NA               | 0.2 (0.0-1.2)   | 0.6 (0.2-1.3)  | 0.5 (0.3-1.0)  | 0.89                             |
| Immune deficiency disorder           | 4.6 (3.1-6.9)      | <0.0001              | NA                                                   | NA                  | 27.1 (3.7-200.6)  | 18.0 (4.4-73.8)   | 8.4 (3.1-22.7)   | 6.7 (3.2-14.0)  | 4.4 (2.3-8.4)  | 1.4 (0.5-3.7)  | 0.067                            |
| Kidney disease                       | 4.1 (3.5-4.8)      | <0.0001              | NA                                                   | NA                  | 57.0 (17.3-188.3) | 15.2 (4.8-48.3)   | 17.7 (10.4-30.2) | 10.3 (7.5-14.2) | 4.1 (3.1-5.3)  | 2.5 (2.0-3.1)  | <0.0001                          |
| Liver disease                        | 2.3 (1.7-3.2)      | <0.0001              | NA                                                   | NA                  | 42.8 (10.2-180.4) | 7.8 (1.9-31.8)    | 7.6 (3.9-14.9)   | 4.3 (2.6-7.1)   | 1.1 (0.5-2.4)  | 1.0 (0.5-1.9)  | <0.0001                          |
| Lung disease                         | 2.1 (1.9-2.4)      | <0.0001              | NA                                                   | 14.5 (1.7-124.4)    | 14.0 (5.9-33.5)   | 3.4 (1.4-8.3)     | 3.6 (2.2-5.7)    | 3.4 (2.6-4.5)   | 2.3 (1.9-2.8)  | 1.7 (1.4-1.9)  | <0.0001                          |
| Neurological disorders               | 3.1 (2.8-3.5)      | <0.0001              | 127.6 (26.3-619.1)                                   | 195.8 (37.7-1016.8) | 19.4 (4.6-81.2)   | 25.5 (12.3-52.9)  | 17.0 (10.7-27.1) | 8.0 (5.7-11.2)  | 3.6 (2.9-4.6)  | 2.3 (2.0-2.7)  | <0.0001                          |
| Obesity                              | 5.6 (2.3-14.0)     | 0.00017              | NA                                                   | NA                  | NA                | NA                | 10.6 (2.9-39.1)  | 8.5 (2.5-29.1)  | 4.2 (1.0-17.2) | 4.0 (1.1-15.0) | 0.78                             |
| Any underlying condition (≥1)        | 2.1 (2.1-2.2)      | <0.0001              | 33.8 (12.6-90.7)                                     | 24.0 (7.3-78.8)     | 16.6 (10.5-26.4)  | 9.4 (7.0-12.4)    | 6.5 (5.6-7.7)    | 4.1 (3.7-4.5)   | 2.3 (2.2-2.5)  | 1.6 (1.5-1.7)  | <0.0001                          |
| Number of underlying conditions (1)  | 2.1 (2.0-2.1)      | <0.0001              | 33.8 (12.3-93.3)                                     | 23.5 (6.8-81.3)     | 16.4 (10.2-26.4)  | 9.4 (7.0-12.6)    | 6.4 (5.4-7.5)    | 3.9 (3.6-4.3)   | 2.3 (2.1-2.4)  | 1.6 (1.5-1.6)  | <0.0001                          |
| Number of underlying conditions (2)  | 3.0 (2.7-3.4)      | <0.0001              | 63.3 (7.7-518.5)                                     | 60.7 (7.1-522.3)    | 34.7 (13.5-89.3)  | 9.6 (3.9-23.7)    | 9.7 (6.3-15.0)   | 5.6 (4.4-7.3)   | 2.6 (2.1-3.2)  | 2.4 (2.1-2.8)  | <0.0001                          |
| Number of underlying conditions (3+) | 5.5 (4.8-6.3)      | <0.0001              | NA                                                   | NA                  | NA                | 32.0 (10.0-102.1) | 18.7 (10.3-33.7) | 12.6 (9.4-16.8) | 6.5 (5.3-8.0)  | 3.8 (3.2-4.5)  | <0.0001                          |

<sup>1</sup>p-values based on likelihood ratio test; aOR: adjusted odds ratio; CI: confidence interval; NA: Not available as no outcome occurred within the age group; Age presented in years



**Table S12 Age-adjusted and age-stratum specific associations between underlying condition and in-hospital death for the sensitivity analysis, 6 February – 13 December 2020**

|                                      | Age-adjusted model |                      | Age-interaction model, stratum-specific aOR (95% CI) |                  |                  |                 |                |                |                |               | Interaction p-value <sup>1</sup> |
|--------------------------------------|--------------------|----------------------|------------------------------------------------------|------------------|------------------|-----------------|----------------|----------------|----------------|---------------|----------------------------------|
|                                      | aOR                | p-value <sup>1</sup> | <20                                                  | 20-29            | 30-39            | 40-49           | 50-59          | 60-69          | 70-79          | ≥80           |                                  |
| Asthma                               | 0.7 (0.2-2.0)      | 0.46                 | NA                                                   | NA               | NA               | NA              | NA             | 2.3 (0.5-11.0) | 0.5 (0.1-4.6)  | 0.5 (0.1-4.2) | 0.82                             |
| Cancer                               | 1.5 (1.4-1.7)      | <0.0001              | 20.5 (5.7-73.8)                                      | 14.9 (1.6-140.3) | 11.3 (4.4-29.3)  | 7.8 (4.7-12.9)  | 4.3 (3.2-5.7)  | 2.6 (2.2-3.1)  | 1.5 (1.3-1.7)  | 1.1 (0.9-1.2) | <0.0001                          |
| Cardiac disorder                     | 1.5 (1.4-1.6)      | <0.0001              | NA                                                   | 16.3 (1.7-152.9) | 7.0 (2.7-17.7)   | 2.5 (1.5-4.2)   | 1.8 (1.4-2.3)  | 1.8 (1.6-2.1)  | 1.5 (1.4-1.7)  | 1.4 (1.3-1.5) | 0.00047                          |
| Diabetes                             | 1.5 (1.4-1.6)      | <0.0001              | NA                                                   | NA               | 2.0 (0.6-6.9)    | 2.2 (1.3-3.9)   | 2.5 (1.9-3.2)  | 1.9 (1.6-2.2)  | 1.6 (1.4-1.8)  | 1.3 (1.2-1.4) | <0.0001                          |
| Hypertension                         | 0.5 (0.3-0.9)      | 0.021                | NA                                                   | NA               | NA               | NA              | NA             | 0.2 (0.0-1.5)  | 0.8 (0.3-2.1)  | 0.5 (0.2-1.3) | 0.87                             |
| Immune deficiency disorder           | 3.1 (1.9-4.9)      | <0.0001              | NA                                                   | NA               | 9.1 (1.1-75.0)   | 2.8 (0.4-21.2)  | 2.9 (1.0-8.3)  | 4.2 (1.8-9.8)  | 3.0 (1.4-6.5)  | 1.3 (0.3-5.7) | 0.9                              |
| Kidney disease                       | 2.4 (2.0-2.9)      | <0.0001              | NA                                                   | NA               | 10.7 (3.0-38.3)  | 2.9 (0.9-9.6)   | 3.9 (2.1-7.1)  | 3.8 (2.6-5.5)  | 2.1 (1.6-2.9)  | 1.8 (1.4-2.4) | 0.024                            |
| Liver disease                        | 1.7 (1.1-2.6)      | 0.016                | NA                                                   | NA               | 32.4 (6.0-173.9) | 2.9 (0.7-12.6)  | 3.7 (1.5-8.9)  | 2.4 (1.3-4.4)  | 0.5 (0.1-1.5)  | 0.8 (0.3-2.3) | 0.0056                           |
| Lung disease                         | 1.6 (1.4-1.8)      | <0.0001              | NA                                                   | NA               | 9.1 (3.6-23.5)   | 1.4 (0.5-3.8)   | 1.7 (1.0-2.8)  | 2.1 (1.5-2.8)  | 1.5 (1.2-1.9)  | 1.4 (1.2-1.8) | 0.048                            |
| Neurological disorders               | 3.1 (2.6-3.6)      | <0.0001              | 26.5 (4.6-151.9)                                     | 23.6 (2.5-226.7) | 2.9 (0.4-22.4)   | 10.1 (4.5-22.7) | 6.6 (3.8-11.4) | 4.4 (2.9-6.6)  | 3.0 (2.2-4.1)  | 2.3 (1.9-2.9) | 0.00018                          |
| Obesity                              | 3.2 (1.1-9.4)      | 0.031                | NA                                                   | NA               | NA               | NA              | 4.2 (0.8-21.5) | 7.9 (1.8-34.6) | 3.3 (0.7-16.7) | 1.6 (0.3-8.2) | 0.7                              |
| Any underlying condition (≥1)        | 1.6 (1.6-1.7)      | <0.0001              | 8.2 (2.7-25.5)                                       | 6.6 (1.6-26.6)   | 6.5 (3.8-11.2)   | 3.2 (2.4-4.5)   | 2.6 (2.1-3.1)  | 2.2 (2.0-2.5)  | 1.6 (1.5-1.7)  | 1.4 (1.3-1.4) | <0.0001                          |
| Number of underlying conditions (1)  | 1.6 (1.5-1.6)      | <0.0001              | 8.1 (2.5-25.7)                                       | 5.6 (1.2-25.3)   | 6.2 (3.5-10.8)   | 3.2 (2.3-4.4)   | 2.5 (2.1-2.9)  | 2.1 (1.9-2.3)  | 1.6 (1.5-1.7)  | 1.3 (1.3-1.4) | <0.0001                          |
| Number of underlying conditions (2)  | 2.3 (2.0-2.7)      | <0.0001              | 15.7 (1.7-145.6)                                     | 24.9 (2.7-233.6) | 16.6 (5.4-51.1)  | 3.9 (1.5-10.0)  | 4.5 (2.7-7.6)  | 4.0 (3.0-5.3)  | 1.9 (1.4-2.4)  | 1.9 (1.5-2.3) | <0.0001                          |
| Number of underlying conditions (3+) | 3.3 (2.8-3.9)      | <0.0001              | NA                                                   | NA               | NA               | 7.8 (2.3-26.2)  | 5.6 (2.9-10.6) | 5.9 (4.2-8.1)  | 3.4 (2.6-4.3)  | 2.4 (1.9-3.0) | <0.0001                          |

<sup>1</sup>p-values based on likelihood ratio test; aOR: adjusted odds ratio; CI: confidence interval; NA: Not available as no outcome occurred within the age group; Age presented in years

**Table S13 Predicted probabilities of hospitalisation for each underlying conditions and exposure compared to COVID-19 cases without an underlying condition for the sensitivity analysis, 7 February – 13 December 2020**

|                            | Variable value* | Age groups          |                     |                     |                     |                     |                     |                     |                     |
|----------------------------|-----------------|---------------------|---------------------|---------------------|---------------------|---------------------|---------------------|---------------------|---------------------|
|                            |                 | <20                 | 20-29               | 30-39               | 40-49               | 50-59               | 60-69               | 70-79               | ≥80                 |
| Asthma                     | 0               | 1.90 (1.79-2.03)    | 2.34 (2.22-2.48)    | 3.47 (3.30-3.63)    | 4.73 (4.53-4.93)    | 7.77 (7.47-8.07)    | 16.09 (15.54-16.67) | 29.77 (28.89-30.67) | 35.26 (34.30-36.23) |
| Asthma                     | 1               | 4.19 (2.18-7.89)    | 2.98 (1.55-5.65)    | 6.47 (4.09-10.07)   | 9.16 (6.41-12.93)   | 13.58 (9.56-18.93)  | 18.26 (11.82-27.12) | 38.91 (24.91-55.02) | 56.12 (35.63-74.71) |
| Cancer                     | 0               | 1.92 (1.81-2.05)    | 2.37 (2.25-2.51)    | 3.51 (3.35-3.68)    | 4.80 (4.60-5.00)    | 7.89 (7.59-8.19)    | 16.29 (15.73-16.86) | 30.09 (29.21-30.98) | 35.77 (34.82-36.73) |
| Cancer                     | 1               | 33.01 (26.12-40.73) | 11.35 (7.99-15.88)  | 13.78 (11.25-16.78) | 15.08 (13.38-16.94) | 19.35 (18.02-20.75) | 32.18 (30.62-33.78) | 44.05 (42.47-45.64) | 42.64 (41.11-44.18) |
| Cardiac disorder           | 0               | 1.83 (1.72-1.95)    | 2.28 (2.17-2.41)    | 3.39 (3.24-3.55)    | 4.63 (4.45-4.83)    | 7.61 (7.34-7.90)    | 15.72 (15.19-16.25) | 29.07 (28.24-29.92) | 34.76 (33.86-35.67) |
| Cardiac disorder           | 1               | 8.32 (5.84-11.73)   | 9.02 (6.57-12.25)   | 12.70 (10.75-14.93) | 13.49 (12.38-14.67) | 19.03 (18.12-19.97) | 28.90 (27.82-30.01) | 43.78 (42.54-45.04) | 45.33 (44.22-46.45) |
| Diabetes                   | 0               | 1.83 (1.71-1.94)    | 2.26 (2.14-2.39)    | 3.36 (3.20-3.52)    | 4.58 (4.39-4.77)    | 7.52 (7.24-7.82)    | 15.58 (15.05-16.13) | 28.91 (28.05-29.78) | 34.44 (33.51-35.39) |
| Diabetes                   | 1               | 12.62 (8.97-17.47)  | 10.38 (7.74-13.78)  | 15.69 (13.54-18.10) | 18.91 (17.24-20.71) | 26.00 (24.55-27.50) | 35.56 (34.12-37.02) | 46.20 (44.73-47.67) | 44.80 (43.43-46.17) |
| Hypertension               | 0               | 1.92 (1.80-2.04)    | 2.36 (2.24-2.50)    | 3.50 (3.34-3.66)    | 4.77 (4.57-4.97)    | 7.83 (7.54-8.14)    | 16.21 (15.66-16.78) | 29.96 (29.08-30.85) | 35.47 (34.52-36.43) |
| Hypertension               | 1               | 22.09 (8.91-45.10)  | 5.38 (1.34-19.31)   | 5.84 (2.93-11.30)   | 5.67 (3.82-8.34)    | 9.01 (7.13-11.33)   | 12.84 (10.25-15.97) | 25.07 (20.07-30.83) | 37.14 (30.63-44.14) |
| Immune deficiency disorder | 0               | 1.91 (1.79-2.04)    | 2.35 (2.23-2.49)    | 3.48 (3.32-3.65)    | 4.75 (4.55-4.95)    | 7.80 (7.50-8.10)    | 16.14 (15.58-16.72) | 29.84 (28.95-30.75) | 35.34 (34.38-36.32) |
| Immune deficiency disorder | 1               | 13.85 (6.25-27.93)  | 8.30 (4.32-15.39)   | 12.91 (8.52-19.10)  | 19.03 (14.36-24.77) | 22.04 (17.77-27.01) | 35.35 (27.23-44.41) | 50.44 (39.39-61.46) | 41.47 (28.67-55.54) |
| Kidney disease             | 0               | 1.92 (1.80-2.04)    | 2.36 (2.23-2.49)    | 3.49 (3.33-3.66)    | 4.76 (4.56-4.97)    | 7.82 (7.52-8.12)    | 16.18 (15.62-16.76) | 29.90 (29.01-30.81) | 35.41 (34.45-36.39) |
| Kidney disease             | 1               | 13.22 (6.88-23.89)  | 18.06 (11.34-27.54) | 24.19 (18.47-31.01) | 27.99 (22.99-33.62) | 36.63 (31.88-41.65) | 45.72 (41.03-50.49) | 57.96 (53.37-62.42) | 58.12 (53.83-62.30) |
| Liver disease              | 0               | 1.92 (1.81-2.05)    | 2.37 (2.24-2.50)    | 3.50 (3.34-3.67)    | 4.78 (4.58-4.99)    | 7.85 (7.55-8.16)    | 16.25 (15.68-16.83) | 30.02 (29.12-30.93) | 35.54 (34.58-36.52) |
| Liver disease              | 1               | 12.14 (3.08-37.54)  | 5.62 (1.78-16.34)   | 12.68 (7.84-19.87)  | 16.11 (12.22-20.95) | 14.07 (10.90-17.97) | 30.81 (25.54-36.62) | 34.59 (26.47-43.71) | 32.27 (23.23-42.87) |
| Lung disease               | 0               | 1.93 (1.81-2.05)    | 2.37 (2.25-2.51)    | 3.51 (3.35-3.68)    | 4.79 (4.59-5.00)    | 7.87 (7.57-8.17)    | 16.27 (15.71-16.84) | 30.03 (29.15-30.93) | 35.62 (34.66-36.58) |
| Lung disease               | 1               | 2.65 (1.88-3.74)    | 4.16 (3.24-5.32)    | 8.09 (6.75-9.66)    | 9.97 (8.72-11.37)   | 16.79 (15.28-18.43) | 31.03 (28.70-33.47) | 44.81 (42.03-47.63) | 45.39 (42.74-48.07) |

|                                       |    |                     |                    |                     |                     |                     |                     |                     |                     |
|---------------------------------------|----|---------------------|--------------------|---------------------|---------------------|---------------------|---------------------|---------------------|---------------------|
| Neurological disorders                | 0  | 1.91 (1.80-2.04)    | 2.36 (2.23-2.49)   | 3.49 (3.33-3.66)    | 4.76 (4.56-4.96)    | 7.81 (7.52-8.12)    | 16.16 (15.60-16.74) | 29.86 (28.97-30.77) | 35.39 (34.42-36.36) |
| Neurological disorders                | 1  | 12.24 (7.83-18.64)  | 9.79 (6.29-14.94)  | 12.96 (9.61-17.26)  | 16.68 (13.29-20.72) | 24.53 (20.94-28.51) | 33.94 (29.71-38.45) | 36.92 (33.31-40.69) | 38.60 (35.91-41.36) |
| Obesity                               | 0  | 1.91 (1.79-2.03)    | 2.35 (2.22-2.48)   | 3.47 (3.31-3.64)    | 4.74 (4.54-4.94)    | 7.78 (7.49-8.09)    | 16.12 (15.56-16.70) | 29.82 (28.93-30.72) | 35.31 (34.35-36.29) |
| Obesity                               | 1  | 5.14 (1.30-18.29)   | 9.06 (5.42-14.75)  | 6.70 (3.99-11.05)   | 12.29 (8.74-17.01)  | 18.27 (13.85-23.70) | 26.14 (18.44-35.65) | 48.81 (34.69-63.13) | 71.19 (54.53-83.59) |
| Any underlying condition ( $\geq 1$ ) | 0  | 1.74 (1.64-1.84)    | 2.18 (2.08-2.29)   | 3.24 (3.11-3.37)    | 4.42 (4.27-4.57)    | 7.29 (7.08-7.50)    | 15.06 (14.67-15.47) | 28.04 (27.40-28.69) | 33.81 (33.12-34.50) |
| Any underlying condition ( $\geq 1$ ) | 1  | 7.72 (6.84-8.69)    | 6.42 (5.80-7.11)   | 10.76 (10.09-11.48) | 13.83 (13.25-14.44) | 19.47 (18.92-20.04) | 30.50 (29.83-31.19) | 44.02 (43.26-44.78) | 44.43 (43.72-45.15) |
| Number of underlying conditions       | 0  | 1.65 (1.56-1.75)    | 2.07 (1.97-2.18)   | 3.08 (2.96-3.21)    | 4.20 (4.05-4.35)    | 6.91 (6.71-7.13)    | 14.34 (13.95-14.75) | 26.84 (26.19-27.50) | 32.40 (31.70-33.11) |
| Number of underlying conditions       | 1  | 7.15 (6.29-8.12)    | 5.99 (5.36-6.69)   | 10.06 (9.38-10.79)  | 12.82 (12.23-13.44) | 18.41 (17.84-19.00) | 28.93 (28.21-29.65) | 41.80 (40.97-42.62) | 42.35 (41.58-43.13) |
| Number of underlying conditions       | 2  | 10.02 (6.67-14.79)  | 8.87 (6.61-11.82)  | 11.93 (9.61-14.72)  | 15.90 (13.86-18.17) | 18.41 (16.71-20.24) | 28.34 (26.38-30.38) | 44.09 (41.75-46.46) | 47.76 (45.48-50.04) |
| Number of underlying conditions       | 3+ | 30.40 (15.21-51.54) | 15.67 (7.65-29.41) | 31.39 (23.41-40.64) | 29.84 (24.77-35.46) | 32.40 (28.89-36.11) | 46.78 (43.50-50.09) | 61.75 (58.92-64.51) | 54.52 (51.89-57.12) |

\*0 indicates no underlying health condition, reference group; The probabilities were estimated from the fully adjusted age-interaction models. Baseline risks may therefore vary between the different models. CI: Confidence interval; NA: Not available as no outcome occurred within the age group, PP: predicted probabilities.

**Table S14 Predicted probabilities of death for each underlying conditions and exposure compared to COVID-19 cases without an underlying condition for the sensitivity analysis, 7 February – 13 December 2020**

| Variable                   | Variable value* | Age groups       |                  |                  |                  |                  |                  |                     |                     |
|----------------------------|-----------------|------------------|------------------|------------------|------------------|------------------|------------------|---------------------|---------------------|
|                            |                 | <20              | 20-29            | 30-39            | 40-49            | 50-59            | 60-69            | 70-79               | ≥80                 |
| Asthma                     | 0               | 0.00 (0.00-0.01) | 0.01 (0.00-0.01) | 0.03 (0.02-0.04) | 0.07 (0.06-0.09) | 0.22 (0.18-0.26) | 0.98 (0.84-1.15) | 3.75 (3.24-4.34)    | 10.83 (9.47-12.36)  |
| Asthma                     | 1               | NA               | NA               | NA               | NA               | NA               | 1.19 (0.29-4.73) | 4.06 (0.96-15.52)   | 8.29 (1.95-29.11)   |
| Cancer                     | 0               | 0.01 (0.00-0.01) | 0.01 (0.01-0.02) | 0.04 (0.03-0.05) | 0.08 (0.07-0.10) | 0.26 (0.22-0.30) | 1.17 (1.04-1.33) | 4.48 (3.99-5.02)    | 12.78 (11.53-14.14) |
| Cancer                     | 1               | 2.02 (0.89-4.49) | 0.44 (0.11-1.77) | 1.31 (0.77-2.24) | 1.60 (1.18-2.18) | 2.44 (2.02-2.93) | 5.41 (4.69-6.22) | 9.69 (8.59-10.92)   | 16.24 (14.57-18.05) |
| Cardiac disorder           | 0               | 0.01 (0.00-0.01) | 0.01 (0.00-0.02) | 0.04 (0.03-0.05) | 0.08 (0.07-0.10) | 0.25 (0.22-0.28) | 1.12 (1.00-1.25) | 4.28 (3.87-4.73)    | 12.31 (11.26-13.44) |
| Cardiac disorder           | 1               | 0.32 (0.08-1.29) | 0.15 (0.02-1.04) | 0.59 (0.32-1.11) | 0.59 (0.43-0.81) | 1.02 (0.86-1.20) | 3.07 (2.72-3.46) | 8.78 (7.94-9.69)    | 18.76 (17.25-20.37) |
| Diabetes                   | 0               | 0.00 (0.00-0.01) | 0.01 (0.00-0.01) | 0.03 (0.02-0.04) | 0.07 (0.05-0.08) | 0.20 (0.17-0.24) | 0.92 (0.77-1.09) | 3.50 (2.97-4.12)    | 10.12 (8.69-11.75)  |
| Diabetes                   | 1               | NA               | NA               | 0.24 (0.10-0.57) | 0.66 (0.45-0.97) | 1.56 (1.25-1.95) | 3.60 (3.01-4.31) | 8.10 (6.88-9.52)    | 14.48 (12.47-16.75) |
| Hypertension               | 0               | 0.00 (0.00-0.01) | 0.01 (0.00-0.01) | 0.03 (0.02-0.04) | 0.07 (0.05-0.08) | 0.20 (0.17-0.24) | 0.92 (0.78-1.09) | 3.52 (3.00-4.13)    | 10.21 (8.81-11.81)  |
| Hypertension               | 1               | NA               | NA               | NA               | NA               | NA               | 0.35 (0.11-1.10) | 1.89 (0.88-4.02)    | 14.55 (10.03-20.66) |
| Immune deficiency disorder | 0               | 0.00 (0.00-0.01) | 0.01 (0.00-0.01) | 0.03 (0.02-0.04) | 0.07 (0.06-0.09) | 0.21 (0.18-0.25) | 0.96 (0.82-1.13) | 3.68 (3.15-4.29)    | 10.63 (9.22-12.23)  |
| Immune deficiency disorder | 1               | NA               | NA               | 1.06 (0.33-3.30) | 0.69 (0.22-2.15) | 1.54 (0.83-2.84) | 4.81 (2.69-8.46) | 10.49 (6.34-16.88)  | 22.43 (13.71-34.47) |
| Kidney disease             | 0               | 0.01 (0.00-0.01) | 0.01 (0.00-0.01) | 0.03 (0.02-0.05) | 0.07 (0.06-0.09) | 0.22 (0.19-0.26) | 1.02 (0.88-1.18) | 3.88 (3.38-4.45)    | 11.17 (9.85-12.65)  |
| Kidney disease             | 1               | NA               | NA               | 1.05 (0.39-2.82) | 1.30 (0.64-2.64) | 2.71 (1.77-4.15) | 7.25 (5.49-9.50) | 13.92 (11.25-17.11) | 21.84 (18.36-25.78) |
| Liver disease              | 0               | 0.00 (0.00-0.01) | 0.01 (0.00-0.01) | 0.03 (0.02-0.04) | 0.07 (0.06-0.09) | 0.21 (0.18-0.25) | 0.96 (0.81-1.13) | 3.66 (3.12-4.28)    | 10.59 (9.15-12.22)  |
| Liver disease              | 1               | NA               | NA               | 0.79 (0.19-3.15) | 0.49 (0.16-1.54) | 1.55 (0.89-2.67) | 3.59 (2.29-5.61) | 4.52 (2.48-8.12)    | 11.91 (7.47-18.46)  |
| Lung disease               | 0               | 0.01 (0.00-0.01) | 0.01 (0.00-0.01) | 0.03 (0.03-0.05) | 0.07 (0.06-0.09) | 0.23 (0.19-0.27) | 1.04 (0.90-1.20) | 3.97 (3.46-4.56)    | 11.46 (10.11-12.96) |
| Lung disease               | 1               | NA               | 0.04 (0.01-0.28) | 0.32 (0.16-0.65) | 0.34 (0.19-0.59) | 0.71 (0.49-1.02) | 3.13 (2.48-3.95) | 9.24 (7.74-10.99)   | 18.66 (16.18-21.43) |

|                                       |          |                  |                  |                  |                  |                  |                   |                     |                     |
|---------------------------------------|----------|------------------|------------------|------------------|------------------|------------------|-------------------|---------------------|---------------------|
| Neurological disorders                | 0        | 0.00 (0.00-0.01) | 0.01 (0.00-0.01) | 0.03 (0.02-0.04) | 0.07 (0.06-0.09) | 0.22 (0.18-0.27) | 1.01 (0.84-1.20)  | 3.86 (3.26-4.56)    | 11.10 (9.52-12.91)  |
| Neurological disorders                | 1        | 0.64 (0.16-2.55) | 0.54 (0.13-2.17) | 0.66 (0.25-1.79) | 1.46 (0.81-2.63) | 3.87 (2.72-5.48) | 6.53 (4.84-8.75)  | 12.72 (10.26-15.68) | 23.77 (20.33-27.61) |
| Obesity                               | 0        | 0.00 (0.00-0.01) | 0.01 (0.00-0.01) | 0.03 (0.02-0.04) | 0.07 (0.06-0.09) | 0.21 (0.18-0.25) | 0.97 (0.83-1.13)  | 3.70 (3.21-4.27)    | 10.70 (9.39-12.18)  |
| Obesity                               | 1        | NA               | NA               | 0.44 (0.06-3.12) | 0.78 (0.19-3.13) | 1.83 (0.67-4.94) | 7.46 (2.95-17.62) | 13.59 (4.21-36.02)  | 36.67 (14.71-66.04) |
| Any underlying condition ( $\geq 1$ ) | 0        | 0.01 (0.00-0.01) | 0.01 (0.01-0.02) | 0.04 (0.03-0.06) | 0.10 (0.08-0.12) | 0.30 (0.27-0.34) | 1.39 (1.29-1.50)  | 5.34 (5.03-5.66)    | 15.03 (14.35-15.74) |
| Any underlying condition ( $\geq 1$ ) | 1        | 0.23 (0.13-0.42) | 0.10 (0.05-0.21) | 0.60 (0.47-0.77) | 0.87 (0.74-1.01) | 1.83 (1.69-1.99) | 4.98 (4.70-5.29)  | 11.72 (11.16-12.29) | 22.30 (21.43-23.21) |
| Number of underlying conditions       | 0        | 0.01 (0.00-0.01) | 0.01 (0.01-0.02) | 0.04 (0.03-0.05) | 0.08 (0.07-0.10) | 0.26 (0.23-0.29) | 1.19 (1.10-1.29)  | 4.55 (4.27-4.85)    | 12.93 (12.26-13.62) |
| Number of underlying conditions       | 1        | 0.22 (0.12-0.40) | 0.08 (0.04-0.19) | 0.50 (0.38-0.66) | 0.77 (0.66-0.91) | 1.56 (1.42-1.70) | 4.16 (3.89-4.44)  | 9.87 (9.33-10.44)   | 18.87 (17.98-19.79) |
| Number of underlying conditions       | 2        | 0.24 (0.03-1.68) | 0.27 (0.07-1.06) | 0.93 (0.48-1.78) | 0.61 (0.32-1.18) | 1.46 (1.04-2.03) | 5.47 (4.59-6.50)  | 11.50 (10.10-13.07) | 29.35 (27.17-31.63) |
| Number of underlying conditions       | $\geq 3$ | NA               | NA               | 2.11 (0.68-6.39) | 1.79 (0.80-3.94) | 4.66 (3.34-6.46) | 9.37 (7.70-11.36) | 19.58 (17.35-22.02) | 34.92 (32.27-37.66) |

\*0 indicates no underlying health condition, reference group; The probabilities were estimated from the fully adjusted age-interaction models. Baseline risks may therefore vary between the different models. CI: Confidence interval; NA: Not available as no outcome occurred within the age group, PP: predicted probabilities.

**Table S15 Predicted probabilities of in-hospital death for each underlying conditions and exposure compared to COVID-19 cases without an underlying condition for the sensitivity analysis, 7 February – 13 December 2020**

|                            | Variable value* | Age groups        |                   |                   |                   |                    |                     |                     |                     |
|----------------------------|-----------------|-------------------|-------------------|-------------------|-------------------|--------------------|---------------------|---------------------|---------------------|
|                            |                 | <20               | 20-29             | 30-39             | 40-49             | 50-59              | 60-69               | 70-79               | ≥80                 |
| Asthma                     | 0               | 0.21 (0.09-0.51)  | 0.29 (0.15-0.56)  | 0.61 (0.42-0.87)  | 1.09 (0.85-1.40)  | 2.02 (1.66-2.46)   | 4.94 (4.15-5.88)    | 10.41 (8.86-12.19)  | 22.09 (19.22-25.26) |
| Asthma                     | 1               | NA                | NA                | NA                | NA                | NA                 | 10.63 (2.52-35.32)  | 4.50 (0.56-28.18)   | 22.82 (5.70-59.14)  |
| Cancer                     | 0               | 0.25 (0.10-0.61)  | 0.35 (0.19-0.66)  | 0.73 (0.51-1.04)  | 1.32 (1.06-1.65)  | 2.46 (2.08-2.89)   | 6.00 (5.22-6.89)    | 12.52 (11.05-14.15) | 25.88 (23.33-28.60) |
| Cancer                     | 1               | 5.61 (2.28-13.16) | 4.13 (1.00-15.50) | 8.86 (5.02-15.16) | 9.42 (6.81-12.88) | 10.90 (8.94-13.22) | 14.28 (12.27-16.55) | 19.54 (17.22-22.10) | 29.85 (26.77-33.13) |
| Cardiac disorder           | 0               | 0.24 (0.10-0.58)  | 0.34 (0.18-0.63)  | 0.70 (0.50-0.99)  | 1.26 (1.02-1.56)  | 2.35 (2.02-2.74)   | 5.74 (5.07-6.50)    | 12.00 (10.75-13.38) | 25.04 (22.85-27.36) |
| Cardiac disorder           | 1               | 1.81 (0.25-11.98) | 1.41 (0.19-9.50)  | 3.32 (1.69-6.40)  | 3.16 (2.24-4.45)  | 4.08 (3.40-4.89)   | 8.67 (7.59-9.88)    | 17.87 (16.06-19.83) | 33.16 (30.52-35.90) |
| Diabetes                   | 0               | 0.20 (0.08-0.50)  | 0.28 (0.15-0.54)  | 0.59 (0.40-0.85)  | 1.06 (0.82-1.36)  | 1.96 (1.60-2.41)   | 4.82 (4.02-5.78)    | 10.17 (8.59-12.00)  | 21.62 (18.68-24.89) |
| Diabetes                   | 1               | NA                | NA                | 1.38 (0.56-3.35)  | 2.86 (1.92-4.24)  | 5.03 (3.97-6.34)   | 9.10 (7.55-10.95)   | 15.93 (13.51-18.70) | 26.69 (23.13-30.57) |
| Hypertension               | 0               | 0.20 (0.08-0.49)  | 0.28 (0.15-0.54)  | 0.58 (0.40-0.84)  | 1.05 (0.82-1.35)  | 1.95 (1.59-2.39)   | 4.78 (3.98-5.72)    | 10.07 (8.51-11.88)  | 21.46 (18.55-24.70) |
| Hypertension               | 1               | NA                | NA                | NA                | NA                | NA                 | 1.98 (0.47-7.90)    | 7.41 (2.92-17.56)   | 18.76 (10.13-32.14) |
| Immune deficiency disorder | 0               | 0.20 (0.08-0.50)  | 0.29 (0.15-0.55)  | 0.59 (0.41-0.86)  | 1.07 (0.83-1.38)  | 1.98 (1.61-2.43)   | 4.84 (4.01-5.83)    | 10.20 (8.58-12.09)  | 21.71 (18.68-25.08) |
| Immune deficiency disorder | 1               | NA                | NA                | 4.77 (1.12-18.14) | 1.90 (0.46-7.55)  | 4.41 (2.19-8.68)   | 12.98 (7.05-22.67)  | 18.66 (10.75-30.41) | 40.99 (23.00-61.75) |
| Kidney disease             | 0               | 0.22 (0.09-0.54)  | 0.31 (0.16-0.59)  | 0.65 (0.45-0.93)  | 1.16 (0.92-1.48)  | 2.16 (1.79-2.59)   | 5.27 (4.48-6.18)    | 11.03 (9.52-12.75)  | 23.22 (20.47-26.20) |
| Kidney disease             | 1               | NA                | NA                | 4.08 (1.48-10.74) | 3.34 (1.46-7.48)  | 6.83 (4.33-10.60)  | 15.06 (11.24-19.88) | 23.02 (18.45-28.32) | 34.84 (29.24-40.89) |
| Liver disease              | 0               | 0.21 (0.09-0.51)  | 0.29 (0.15-0.56)  | 0.61 (0.42-0.88)  | 1.10 (0.85-1.41)  | 2.03 (1.66-2.48)   | 4.97 (4.16-5.94)    | 10.47 (8.88-12.31)  | 22.20 (19.25-25.46) |
| Liver disease              | 1               | NA                | NA                | 7.31 (1.68-26.69) | 3.19 (0.99-9.76)  | 8.66 (4.44-16.20)  | 11.09 (6.69-17.84)  | 9.44 (4.47-18.83)   | 22.47 (12.10-37.88) |
| Lung disease               | 0               | 0.21 (0.09-0.51)  | 0.29 (0.15-0.56)  | 0.61 (0.42-0.88)  | 1.10 (0.85-1.41)  | 2.04 (1.67-2.49)   | 4.99 (4.18-5.95)    | 10.51 (8.92-12.33)  | 22.33 (19.40-25.57) |
| Lung disease               | 1               | NA                | NA                | 3.62 (1.75-7.32)  | 2.49 (1.37-4.49)  | 3.00 (2.01-4.45)   | 8.49 (6.55-10.95)   | 17.26 (14.13-20.91) | 31.84 (27.23-36.83) |

|                                       |          |                   |                   |                   |                    |                    |                     |                     |                     |
|---------------------------------------|----------|-------------------|-------------------|-------------------|--------------------|--------------------|---------------------|---------------------|---------------------|
| Neurological disorders                | 0        | 0.21 (0.09-0.51)  | 0.29 (0.15-0.56)  | 0.61 (0.42-0.88)  | 1.09 (0.85-1.41)   | 2.03 (1.65-2.50)   | 4.97 (4.12-5.98)    | 10.44 (8.78-12.36)  | 22.10 (19.03-25.51) |
| Neurological disorders                | 1        | 6.55 (1.52-24.17) | 3.19 (0.43-20.05) | 3.35 (1.03-10.29) | 8.49 (4.48-15.48)  | 12.58 (8.44-18.33) | 16.80 (12.09-22.85) | 25.43 (20.09-31.63) | 39.56 (33.78-45.65) |
| Obesity                               | 0        | 0.20 (0.08-0.50)  | 0.29 (0.15-0.54)  | 0.59 (0.41-0.85)  | 1.07 (0.83-1.37)   | 1.98 (1.63-2.41)   | 4.84 (4.07-5.77)    | 10.21 (8.69-11.96)  | 21.73 (18.90-24.86) |
| Obesity                               | 1        | NA                | NA                | 9.44 (1.29-45.43) | 10.66 (2.69-33.99) | 10.04 (3.16-27.62) | 32.21 (13.33-59.48) | 29.28 (9.11-63.13)  | 34.10 (10.72-69.04) |
| Any underlying condition ( $\geq 1$ ) | 0        | 0.29 (0.12-0.68)  | 0.39 (0.21-0.73)  | 0.81 (0.58-1.13)  | 1.49 (1.23-1.80)   | 2.80 (2.49-3.15)   | 6.82 (6.27-7.41)    | 14.12 (13.22-15.08) | 28.66 (27.27-30.09) |
| Any underlying condition ( $\geq 1$ ) | 1        | 2.61 (1.35-4.97)  | 1.27 (0.57-2.82)  | 4.74 (3.67-6.12)  | 4.86 (4.14-5.70)   | 7.00 (6.39-7.67)   | 12.95 (12.13-13.81) | 21.82 (20.71-22.98) | 36.54 (35.09-38.02) |
| Number of underlying conditions       | 0        | 0.25 (0.11-0.61)  | 0.34 (0.18-0.64)  | 0.71 (0.51-0.99)  | 1.29 (1.06-1.57)   | 2.41 (2.14-2.73)   | 5.91 (5.41-6.46)    | 12.35 (11.48-13.27) | 25.55 (24.13-27.03) |
| Number of underlying conditions       | 1        | 2.35 (1.17-4.67)  | 0.88 (0.33-2.33)  | 3.82 (2.86-5.07)  | 4.26 (3.59-5.06)   | 5.89 (5.32-6.52)   | 10.80 (10.01-11.64) | 18.91 (17.76-20.11) | 32.51 (30.92-34.14) |
| Number of underlying conditions       | 2        | 3.22 (0.44-19.93) | 4.12 (1.02-15.17) | 9.48 (4.74-18.05) | 4.51 (2.35-8.51)   | 7.47 (5.20-10.61)  | 19.08 (16.01-22.58) | 23.19 (20.19-26.49) | 40.71 (37.28-44.24) |
| Number of underlying conditions       | $\geq 3$ | NA                | NA                | 8.54 (2.75-23.55) | 5.84 (2.43-13.38)  | 14.07 (9.98-19.47) | 21.71 (17.91-26.07) | 30.47 (26.92-34.27) | 45.34 (41.48-49.26) |

\*0 indicates no underlying health condition, reference group; The probabilities were estimated from the fully adjusted age-interaction models. Baseline risks may therefore vary between the different models. CI: Confidence interval; NA: Not available as no outcome occurred within the age group, PP: predicted probabilities.

**Figure S1 Predicted probabilities of hospitalisation, death and in-hospital death for each underlying conditions compared to COVID-19 cases without an underlying condition for the sensitivity analysis, 7 February – 13 December 2020**

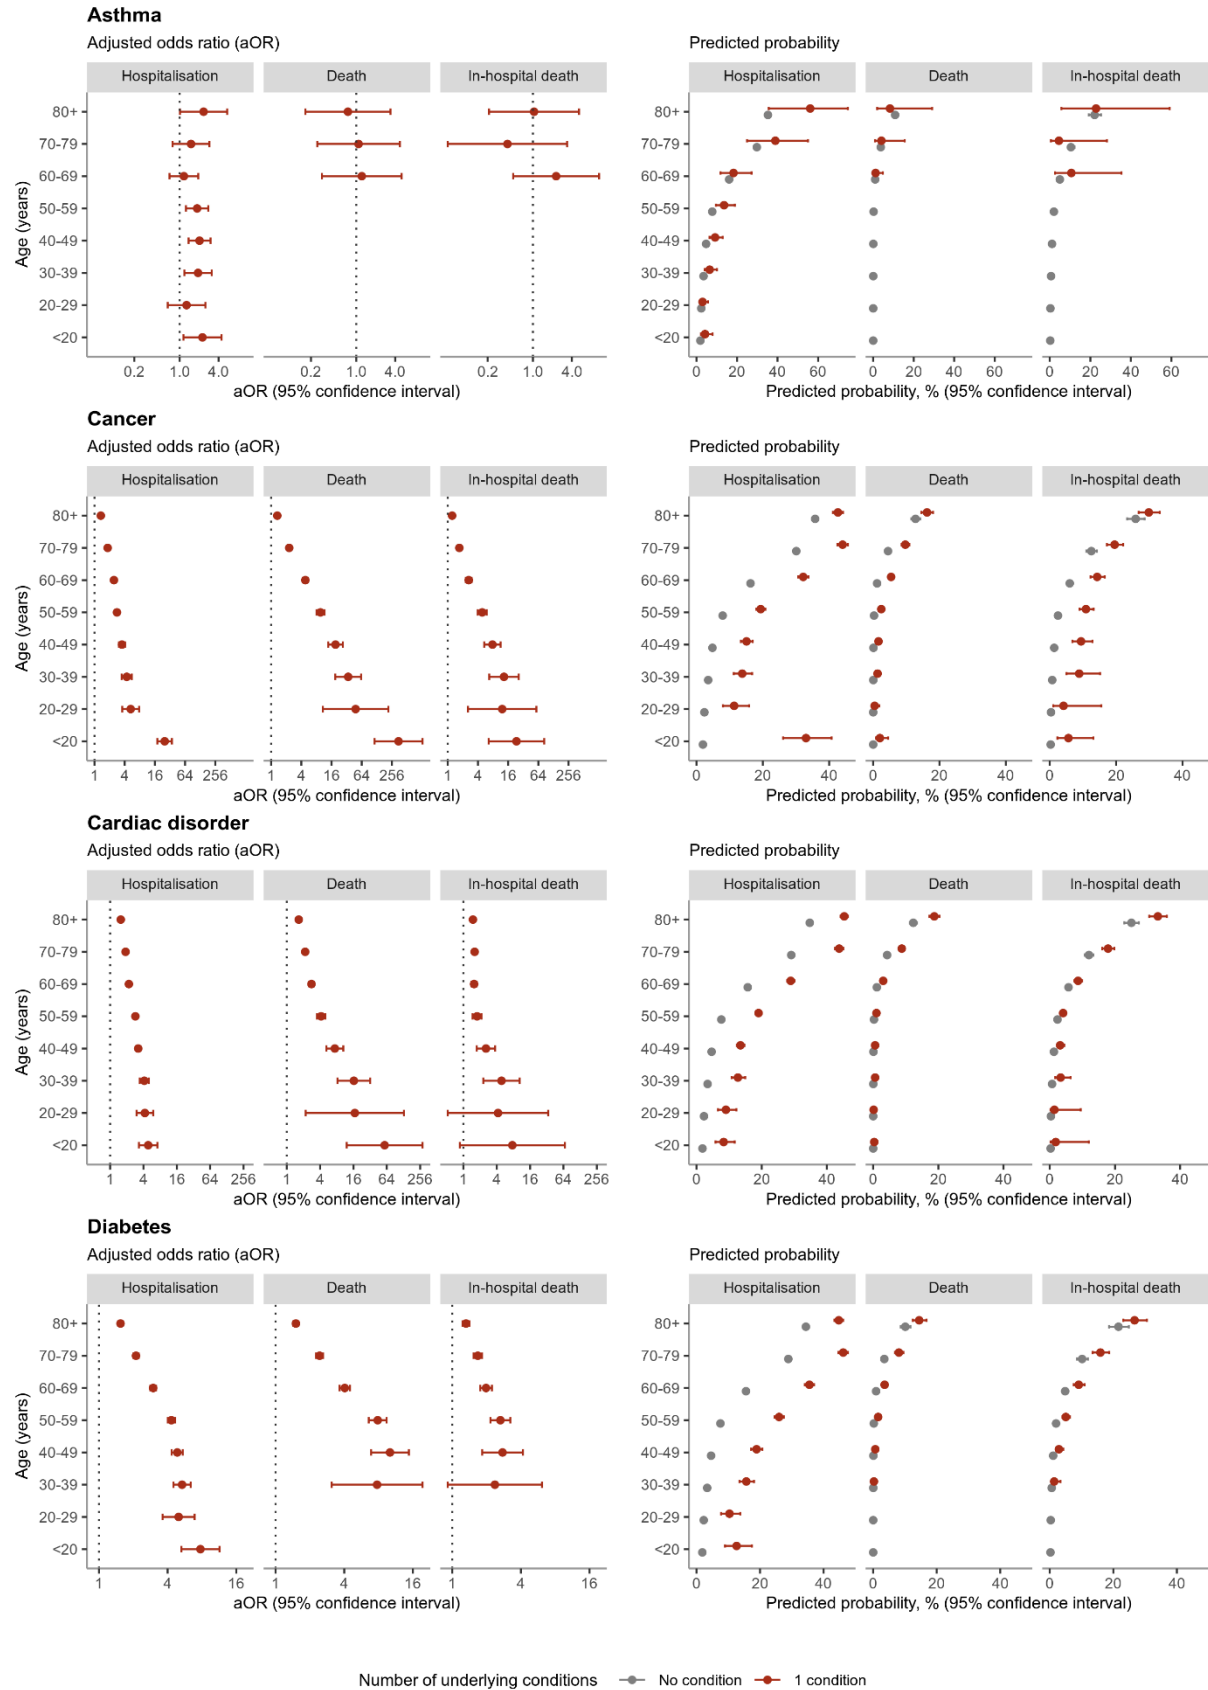



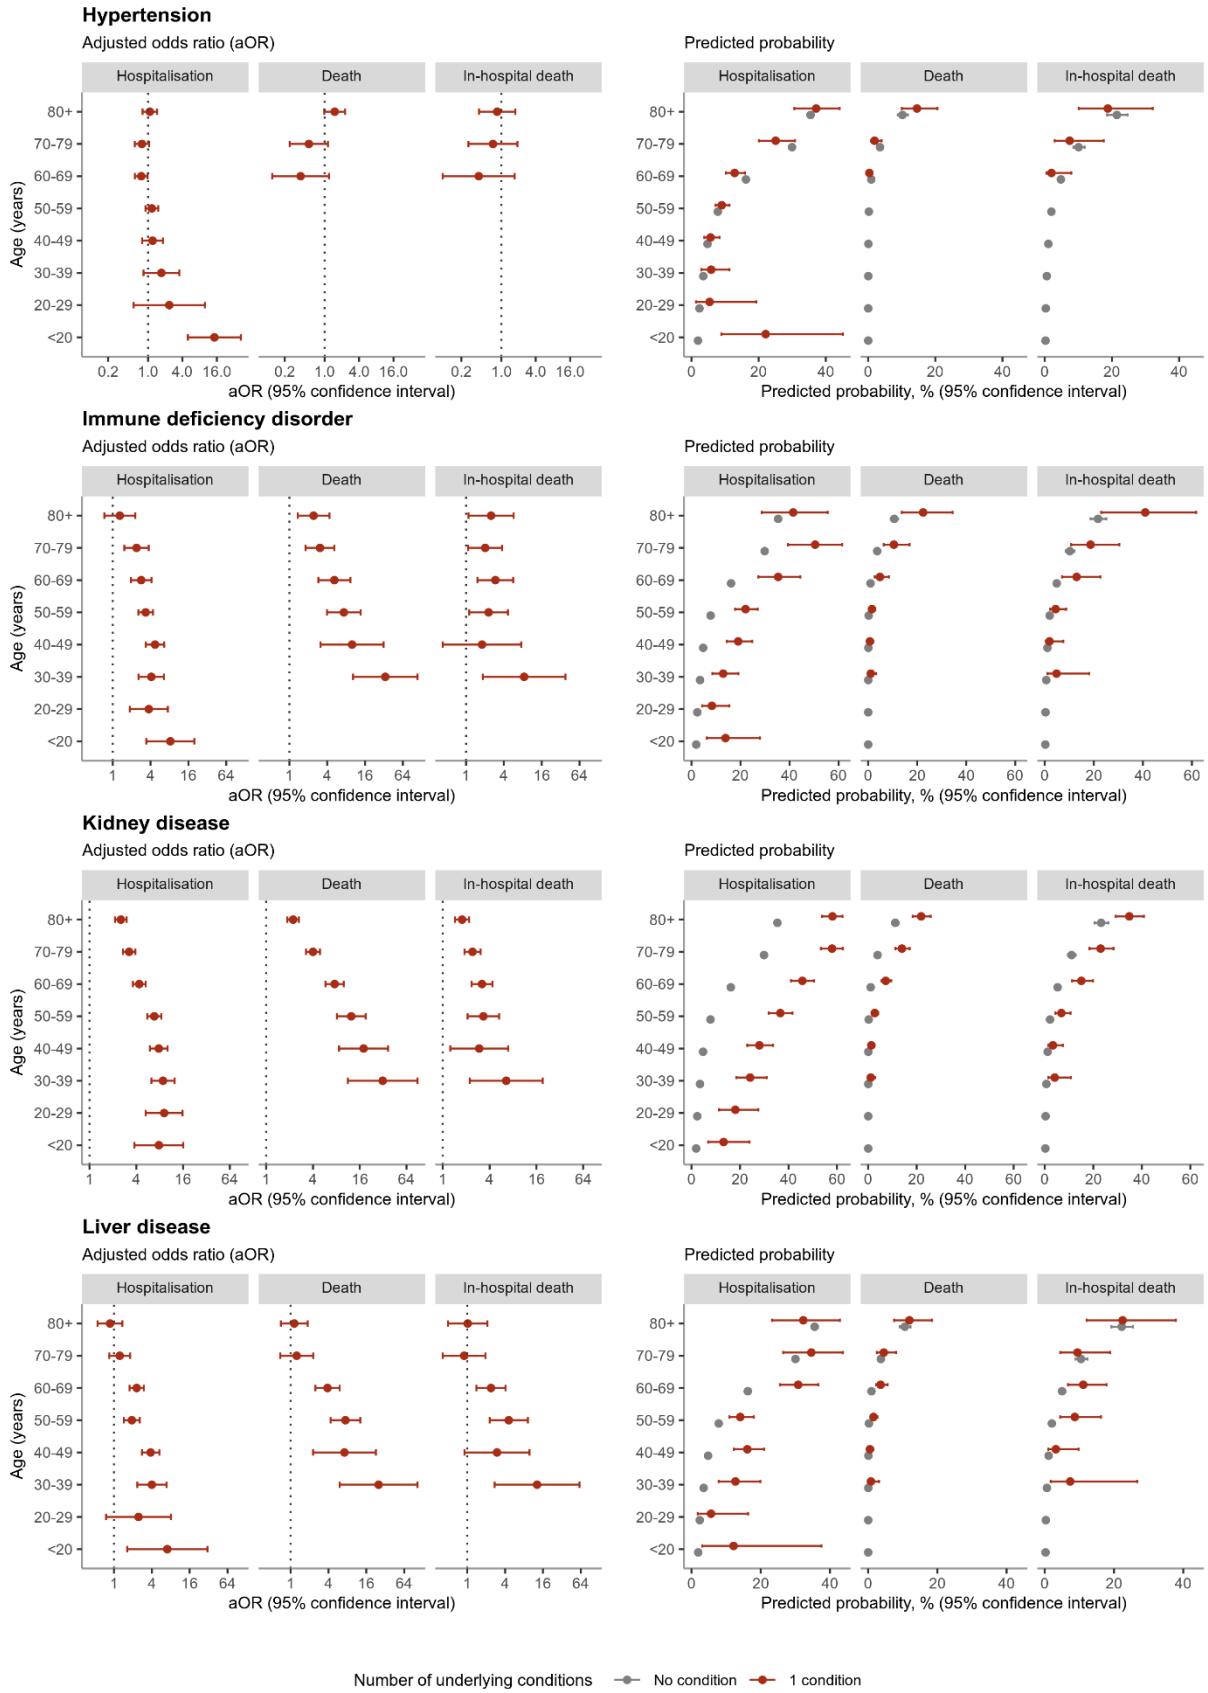

### Lung disease

Adjusted odds ratio (aOR)

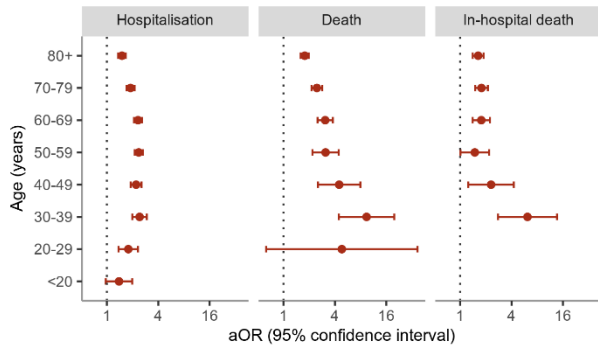

Predicted probability

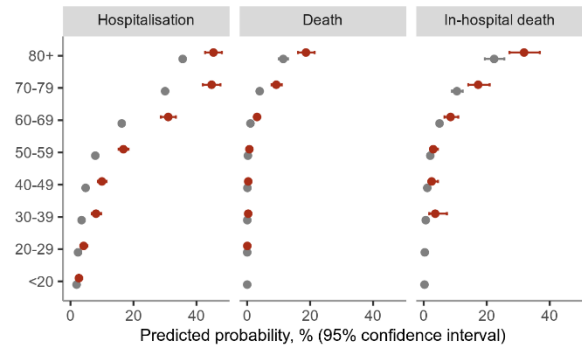

### Neurological disorders

Adjusted odds ratio (aOR)

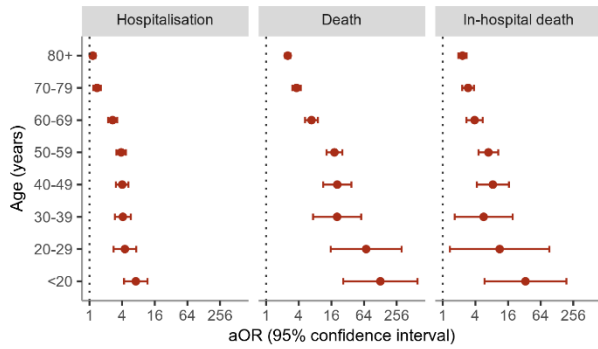

Predicted probability

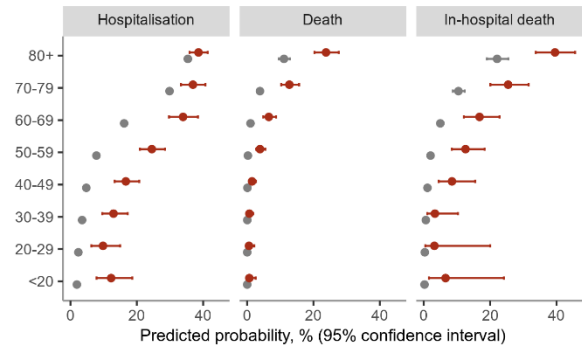

### Obesity

Adjusted odds ratio (aOR)

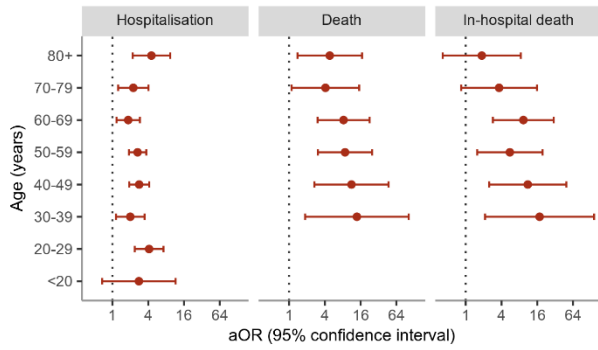

Predicted probability

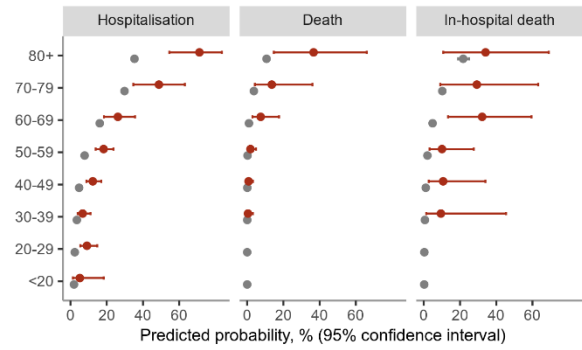

### Number of underlying conditions

Adjusted odds ratio (aOR)

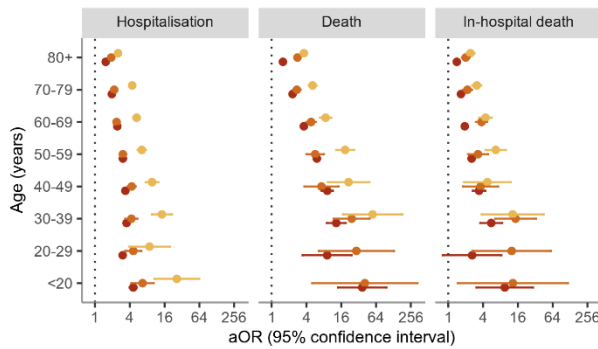

Predicted probability

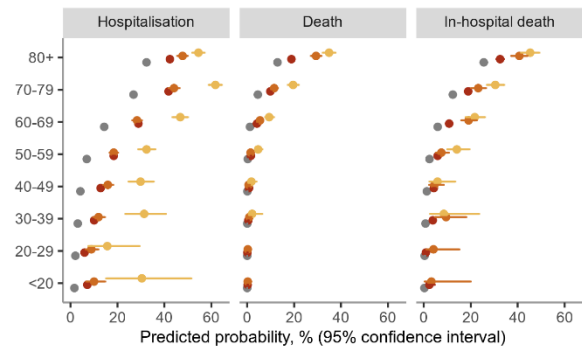

Number of underlying conditions — No condition — 1 condition — 2 conditions — 3 or more conditions
